# Supplementary material for: Somatic mutations found in the healthy blood compartment of a 115-yr-old woman demonstrate oligoclonal hematopoiesis
Source: HighWire-hosted journal article supplement (doi:10.1101/gr.162131.113), 2014-04-23
Supplement: Supplemental_Material.docx [file Supplemental_Material.docx]

**Supplementary Material**

**Somatic mutations found in the healthy blood compartment of a 115-year-old woman demonstrate oligoclonal hematopoiesis**

Henne Holstege1, Wayne Pfeiffer2, Daoud Sie3, Marc Hulsman4, Thomas J. Nicholas5, Clarence C. Lee6, Tristen Ross6, Jue Lin7, Mark A. Miller2, Bauke Ylstra3, Hanne Meijers-Heijboer1, Martijn H. Brugman8, Frank J.T. Staal8, Gert Holstege9, Marcel J.T. Reinders4, Timothy T. Harkins6, Samuel Levy5, Erik A. Sistermans1

1Department of Clinical Genetics, VU University Medical Center, PO Box 7057, 1007 MB Amsterdam, The Netherlands; 2San Diego Supercomputer Center, UCSD, La Jolla CA 92093, USA; 3Department of Pathology, VU University Medical Center, PO Box 7057, 1007 MB Amsterdam, The Netherlands

4Delft Bioinformatics Lab, Delft University of Technology, 2628 CD Delft, The Netherlands; 5Department of Molecular and Experimental Medicine, Scripps Translational Science Institute, San Diego CA 92037, USA; 6Advanced Applications Group, Life Technologies, Beverly MA 01915, USA; 7Department of Biochemistry and Biophysics UCSF, San Francisco 94143, USA; 8Department of Immunohematology and Blood Transfusion, Leiden University Medical Center, Leiden, The Netherlands; 9Centre for Clinical Research, University of Queensland, Herston QLD 4006 Australia

**INDEX**

**Supplemental Results 3**

SR1 Detection of somatic SNVs

SR2 Validation of somatic SNVs

SR3 Identification of somatic indels

SR4 Validation of somatic indels

SR5 Brain DNA was not contaminated with blood

SR6 Functional effect predictions of somatic mutations

SR7 Mutations do not significantly cluster at confined genomic locations

SR8 Variant allele frequency of mutations suggests oligoclonality

SR9 The fractions of the individual clones sum to a value above 100%

SR10 Variants in subclones A and B have the same characteristics

**Supplemental Methods 12**

SM1 DNA isolation

SM2 Whole genome sequencing

SM3 Identification of somatic SNVs

SM4 High stringency and Low Stringency SNV filters

SM5 Indel filters

SM6 Mutation Validation experiments

SM7 Consistency Filter

SM8 Comparison of characteristics between somatic mutations, dbSNP and ClinVar variants.

SM9 Variant enrichment/depletion in regions tracked by ENCODE

**Supplemental Figures 18**

Figure S1 801 SNVs with genotype difference in blood and brain

Figure S2 Results of first validation round

Figure S3 Depth histograms of known SNVs detected with a different genotype in blood and brain by the high stringency filter, per genotype combination

Figure S4 Mutations do not cluster at confined genomic locations

Figure S5 Complete enrichment / depletion analysis of somatic mutations in genomic elements tracked by ENCODE, GERP score

Figure S6 VAF values of confirmed somatic mutations

Figure S7 Copy number analysis W115 blood vs. brain

Figure S8 Depth distribution of SNVs per filter step

**Supplemental Tables 28**

Table S1 Filter steps for HS- and LS-SNV filters

Table S2 Filter steps for SNV detection

Table S3 SNVs detected with high and low stringency filters

Table S4 Validation experiments by Ion Torrent PGM sequencing

Table S5 Somatic indel detection and validation

Table S6 Validation list of 343 tested single nucleotide variants

Table S7 Validation list of 33 tested indels that passed three filters for both GATK and BFAST

Table S8 382 *highly likely* somatic mutations

Table S9 ENCODE analysis results

Table S10 Gaussian fit parameters corresponding to the VAF peaks

Table S11 Damaging variants in genes associated with DNA repair in W115 genome

**Supplemental References 34**

**Supplemental Results**

***SR1 Detection of somatic SNVs***

GATK ([McKenna et al. 2010](#_ENREF_8); [DePristo et al. 2011](#_ENREF_3)) and SAMtools ([Li et al. 2009](#_ENREF_6)), called 3,708,543 and 3,330,061 unique SNVs respectively in both blood and brain sequences (**Figure 2**). The 3,265,602 variant calls that overlapped between the GATK and SAMtools genotyping algorithms were considered most trustworthy. The sequencing reads were filtered for repetitive sequences (Repeat Masker and segmental duplications), strand bias, and depth with high stringency (HS-SNV) and low stringency (LS-SNV) filters (**SM4**). Application of the HS-SNV filter resulted in the detection of 908,460 SNVs, of which more than 99.9% were presumed to be germline since their genotypes in both the blood and brain genomes were identical. However, 801 SNVs had different genotypes in blood and brain (**Figure S1A, Table S2, and Table3A**). Interestingly, more than half of these SNVs (444) were heterozygous in blood and homozygous for the reference allele in brain, and almost all SNVs that were novel to dbSNP belonged to this group (**Figure S1B**).

***SR2 Validation of somatic SNVs***

To confirm genotypes we performed a series of validation experiments using either Ion Torrent PGM sequencing and/or Sanger sequencing. In total, the genotypes of 343 SNVs with various blood/brain genotype combinations were validated in two rounds of validation experiments (**Table S4**).

The first round of validation experiments tested 93 SNVs detected with the HS-SNV filter, comprising: i) 46 *known* SNVs (i.e., known to dbSNP) randomly selected from all variants with different genotypes in blood and brain and ii) 47 *novel* SNVs (i.e., unknown to dbSNP) selected from the subgroup of 208 *novel* SNVs heterozygous in blood and homozygous for the reference allele in brain (**Figure S2**). SNVs that occurred in coding regions were prioritized. Of the 93 SNVs tested, 44/47 of the novel SNVs, and only 2/46 of the known SNVs were confirmed to be somatic in blood. By contrast, 3/47 of the novel SNVs and 44/46 of the known SNVs had the same genotype in blood and brain and were presumably germline variants (**Figure S2**). SOLiD read depth of the known variants was markedly lower compared to novel variants (**Figure S1C, Figure S3**), leading to a wide spread in VAF values (the variant allele frequency (VAF) is the fraction of reads with the variant allele at a given locus). This spread overlapped between homozygous and heterozygous variants and thus led to incorrect genotype calling of these variants in one of the two tissues.

Since all confirmed somatic mutations were heterozygous in blood and homozygous for the reference allele in brain and predominantly novel to dbSNP, we expected to find additional candidate mutations among those SNVs that were genotyped heterozygous in blood and that had ≤1 variant read in brain with a VAF ≤ 0.02 (**Figure S1A**).

To increase the number of detected candidate mutations, we applied a lower stringency filter (LS-SNV), in which we relaxed the repetitive sequence and read-depth restrictions (see **SM4, Table S2, Table S3B**). A total of 2,126 unique variants were detected by the HS-SNV and LS-SNV filters (444 SNVs and 2,108 SNVs, respectively) that were genotyped heterozygous in blood and homozygous for the reference allele in brain. Of these, 612 variants passed as candidate somatic mutations (≤1 variant read in brain or VAF ≤ 0.02), of which 382 were novel and 71 were known SNVs with high read depth (≥20 reads) (**Table 1**). We tested 202/382 novel with high read depth and confirmed 201 novel SNVs (99.5%), and called this group the “*highly likely*” somatic mutations”. Likewise we tested 17/71 known SNVs and confirmed 9 known SNVs (53%) to be somatic mutations, the “*moderately likely-I”* mutations (**Table 1**).Additionally, we tested 10/15 novel and 27/144 known SNVs with low read depth (<20 reads), and confirmed 4 novel SNVs (40%, the “*moderately likely-II”* mutations) and 0 known SNVs (0%) to be somatic mutations (“*slightly likely*”). For control purposes, we also tested 19/107 candidate somatic mutations in brain (≤1 variant read in blood and VAF ≤ 0.02), most of which had low read depths. As expected, all 19 SNVs had the same genotype in blood and brain tissues and were thus germline (**Table S4,** for a list of validated SNVs see **Table S6**).

***SR3 Identification of somatic indels***

GATK also called 324,563 insertions and deletions (indels) up to 344 bases long in either the blood or brain genomes or both. Of these, 9,649 were putatively somatic in blood or brain, i.e., heterozygous in one tissue and homozygous reference in the other (with homozygous variant genotypes neglected). However, when we used IGV ([Thorvaldsdottir et al. 2012](#_ENREF_13)) to visually inspect the read pileups from the BioScope mapping ([Life_Technologies 2010](#_ENREF_7)) for some of the putatively somatic indels, we found that most appeared to be shared between blood and brain or were SNVs instead of indels. Thus we applied three read-depth filters to eliminate the spurious indel calls, which reduced the number of putatively somatic ones to 1,800 that passed the HS-indel filters and 1,418 that passed the LS-indel filters (**Table S5**). Further filtering with BFAST ([Homer et al. 2009](#_ENREF_4)) dramatically reduced the number indels, with 19 passing the HS filters a second time and 14 passing the LS filters a second time (**Table S3**). These are the indels that we designated “detected” somatic. (Note that some indels passed the HS-indel filters for GATK and the LS-indel filters for BFAST, or vice versa. These were categorized as passing the LS-indel filters.)

A limitation of our requirement for perfect BFAST matches is that we could not detect indels that were within 50 bases of a SNV because our alleles for mapping had 50-bp flanks on either side of the indel position, consistent with the 50-bp SOLiD reads. We expect that few, if any, somatic indels were overlooked because of this limitation.

We also looked for indels longer than those found by GATK by constructing long contigs with two de novo assemblers and mapping those contigs against the reference genome.

***SR4 Validation of somatic indels***

We tested a total of 106 indels (**Table S4)**. Although we found and confirmed long indels that were shared between blood and brain, we could not confirm long somatic indels. A plausible reason for the failure of this approach is that assemblers generally find the allele supported by more reads, which requires VAF > 0.5 for the variant to be detected.

We were able to test 18/19 candidate indels that passed high stringency filters (HS-indel) and all were confirmed to be somatic in blood (**SM5)**. We tested 5/11 candidate indels that passed low stringency filters (LS-indel): four were confirmed to be somatic in blood (80%), while one turned out to be germline (**Table 1**). All 22 confirmed somatic indels were novel, and all but one were deletions. Most indels were one base long, with the longest being 8 bases. For a list of validated indels see **Table S7**.

***SR5 Brain DNA was not contaminated with blood***

Histopathological analyses of brain tissue showed normal ratios of neurons and glial cells ([Pelvig et al. 2008](#_ENREF_39)). Immunostaining with glial fibrillary acidic protein (GFAP) and HLA-DR showed the presence of normal resting astrocytes and microglia respectively (data not shown). No infiltration of blood-born macrophages or other blood-derived cells could be observed.

***SR6 Functional effect predictions of somatic mutations***

Of the 382 “*highly likely*” somatic mutations analyzed, 376 variants passed the consistency the filter (**SM7**) and were further analyzed. Four of these mapped to coding regions: three were missense mutations: *CCDC79* (p.R706Q, CGG-CaG, NM_001136505.1), *WDR44* (p.D275H, GAT-cAT, NM_001184965.1), and *IGSF1* (p.P144L, CCT-CtT, NM_205833.3) and one was a nonsense mutation, *TXNDC11* (p.Q604*, CAG-tAG, NM_015914.5). All were confirmed in validation experiments and had VAF values of 0.26, 0.15, 0.24, and 0.26, respectively. However, none of these mutations were predicted to have a deleterious effect on protein function by the SIFT and PolyPhen algorithms ([Kumar et al. 2009](#_ENREF_5); [Ng et al. 2009](#_ENREF_9)). For the remaining somatic SNVs, two mapped in a 3’ UTR (*LRRC8E*, NM_025061.4 and *FBXW7*, NM_001257069.1), three mapped near a gene (within 2,000 bases of the transcribed region), 126 mapped to intronic regions (with none in splice donor/acceptor sequences), and 241 mapped to intergenic regions.

***SR7 Mutations do not significantly cluster at confined genomic locations.***

To determine to what extent the somatic mutations cluster on the genome, distances between neighboring mutations were calculated. Theoretically, if the mutations occurred randomly across the genome, the distances between the mutations should be exponentially distributed. To compare the distribution of distances between somatic mutations with this exponential distribution, we applied the consistency filter (omission of repetitive regions and regions with low read coverage from the analysis). **Figure S4** shows the comparison of the resulting distribution of distances to an exponential distribution (with parameter set to ). The observed close fit indicates that mutations do not significantly cluster at confined genomic locations.

***SR8 Variant allele frequency of mutations suggests oligoclonality***

To detect somatic mutations in the WBCs, those mutations must be present in an active stem cell that gives rise to progeny that comprises a sufficiently large fraction of the WBC pool. The size of a clone can be estimated from the VAFs of the variants it contains. Specifically, since most mutations are heterozygous, the fraction of the cells having the variant allele is roughly twice the VAF.

For a germline variant that is heterozygous, all the cells will have the variant, but only about half the reads will contain the variant, corresponding to a VAF of 0.5. **Figure S6A** shows that W115’s germline variants have a VAF distribution with a peak at a VAF of 0.41. The spread in the distribution arises from the sampling errors in the VAFs from SOLiD reads at ~60x read depth, and the downward shift in the peak relative to a VAF of 0.5 arises because variants called by GATK from SOLiD reads have a reference allele bias (http://gatkforums.broadinstitute.org/discussion/1235/why-didnt-the-unified-genotyper-call-my-snp-i-can-see-it-right-there-in-igv).

**Figure S6A** also shows the VAF distributions from SOLiD reads for the 382 *“highly likely”* somatic mutations and the 201 of those that were confirmed (**Table 1**). The two distributions are roughly the same, but compared to the germline distribution, their peaks are flatter and occur at about half the VAF value. This suggests that the mutations were present in one or two clones that each comprised about half of the cells. Smaller mutant clones may have been present as well, but their VAFs would have been below our detection limit, which was roughly a VAF of 0.1.

To better determine the size of the mutant clone(s), we used the reads from the Ion Torrent PGM sequencing done for validation. This sequencing had a much higher targeted read depth of ~2,000 and was done twice for the 112 variants in the first validation round for all tissues, giving a mean absolute VAF difference of 0.015 between repeat runs. In addition, the reference allele bias was minimal: 11 heterozygous germline SNVs and 33 heterozygous germline indels used as controls had mean VAFs of 0.49 and 0.48, respectively, consistent with the expected 50/50 split between the reference and variant alleles.

***SR9 The fractions of the individual clones sum to a value significantly greater than 1***

To test if the locations of the peaks in the VAF-spectrum indeed sum to a value significantly greater than 1 (after multiplying by 2 to correct for assumed heterozygosity of the somatic mutations), we fit a Gaussian mixture model using a Bayesian procedure. This allowed us to quantify the uncertainty in the estimates of the peak locations. As discussed in the main manuscript, we fit a mixture model consisting of three components (). Probability represented the probability of a variant to be assigned to mixture component . Priors of the variables were set as follows:

- The Dirichlet distribution was used as prior for the probability , with its parameters set to the value 1/3.
- The Inverse Gamma distribution was used as a prior for the variance of each Gaussian, with parameter settings and .
- The Uniform distribution, between 0.0 and 0.5, was used as prior for each

We reduced optimization complexity by assigning variants to the mixture components such that the log-likelihood score was maximized (instead of co-optimizing the assignment of a component to each variant). The model was fit using a Markov Chain Monte Carlo procedure (MCMC), taking 500,000 samples, with a burn-in of 100,000 and a thinning factor of 40. **Table S10** gives the values of the fit parameters, with the values of the first two components corresponding to the VAF peaks. The third component is necessary to represent a few outlier variants (e.g., one with a VAF frequency of 0.53), which are not captured by the tails of the two other Gaussians. Note the high standard deviation of the third component; the Gaussian distribution of this component essentially approaches a uniform distribution.

Taking the MCMC trace of the first two values and summing them finally gives us a 95% confidence interval for the combined fraction of both clones: 1.062 to 1.128. The minimum observed value in 10,000 samples was 1.006. The P-value for is therefore (less than) 0.0001.

The presence of other subclones cannot be excluded. At VAF = 0.15 another possible peak is observed. A 4-component Bayesian-based Gaussian mixture model was unable to capture this and did not converge. We therefore cannot conclude that there are more than two separate clones visible. Other clones likely also exist, but they are either too small to be detected (i.e., have a VAF below our detection limit) or have too few variants distinct from those in the two big peaks to stand out. Their presence, however, does not affect the first two Gaussians as their tops fit directly on the tops of the two observed peaks. Also, the removal of SNVs from these peaks is not expected to enlarge the confidence interval of the estimates (thereby reducing our confidence in a summed value above 1.0), because the confidence interval width corresponds to the value of (which would get smaller in that case). Therefore, the presence of other subclones would not change our conclusion that the fractions of the individual clones sum to a value significantly greater than 1.

***SR10 Variants in subclones A and B have the same characteristics***

To estimate which mutations were restricted to the subclone and compare their spectrum to the remaining mutations, we split the mutations into two groups at the intersection (VAF= 0.2858) of two Gaussians (A and B) belonging to the two clones. We found that 132 variants were assigned to the newer subclone (A) and 69 variants were assigned to the older clone (B). The Ti/Tv ratio of the variants that were in groups A and B were very similar (2.7 and 2.8, respectively). Moreover, similar percentages of variants mapped in genes, in or CpHpG or methylated-nonCpG sites, or in Lamina B1 Associated Domains, indicating that there was variant-type consistency between the two groups (**Figure S6B**).

**Supplemental Methods**

***SM1 DNA isolation***

The following tissues were snap frozen several hours after the decease of W115 and kept at -80ºC: whole blood, brain, artery (media and endothelium), kidney (renal pyramid and minor calyx), heart, liver, lung, spleen, aorta, gastric tumor. The brain was treated as described previously ([den Dunnen et al. 2008](#_ENREF_2)). DNA from all tissues was isolated with the Promega Wizard Kit. A separate DNA isolation with Qiagen DNA isolation kit was performed on all tissues except blood. Inspection on gel showed that DNA from all tissues was non-degraded genomic DNA.

Breast tumor tissue was formalin-fixed, paraffin-embedded and archived. DNA was isolated from adjacent FFPE sections on which regions with apparent tumor pathology were marked.

***SM2 Whole genome sequencing***

We used SOLiD paired-end sequencing to obtain whole genome sequences of W115 blood and brain tissues. We obtained 50-bp forward reads and, in most cases, 35-bp reverse reads acquired to a mapped depth of ~60x for each tissue. Reads were mapped to Hg19 using the BioScope mapping from the SOLiD sequence system ([Life_Technologies 2010](#_ENREF_7)). BAM files were processed to cap the ECC corrected quality values to a maximum Phred score of 40. Picard v1.56 (picard.sourceforge.net) was used to mark duplicate reads, and GATK v1.4-17-gd5199db ([McKenna et al. 2010](#_ENREF_8); [DePristo et al. 2011](#_ENREF_3)) was used to perform table recalibration and local realignment, both at the run level and the sample level.

***SM3 Identification of somatic SNVs***

Variants were called using both the GATK Unified Genotyper and Samtools (v0.1.18) ([Li et al. 2009](#_ENREF_6)). DbSNP build 132 and known indel information was obtained from the GATK resource bundle (v1.2). Variant call format (VCF) files containing SNV chromosomal positions and call statistics were annotated with EnsMART (Release 64) for gene/exon information ([Smedley et al. 2009](#_ENREF_12)).

***SM4 High stringency and Low Stringency SNV filters***

The HS-SNV filter eliminated (1) SNVs that mapped to positions in RepeatMasker (RM) (www.repeatmasker.org) and/or in segmental duplications ([Bailey et al. 2002](#_ENREF_1)) leaving 45% of the genome for interrogation **(Tables S1 and S2)**, (2) SNVs for which GATK and SAMtools differed in their genotype call for the same tissue, (3) SNVs with strand bias: (SP>5, SAMtools and SF>5, GATK), (4) SNVs with a homozygous genotype call with <10 reads and (5) SNVs with a heterozygous genotype call for which the read-depth for the reference allele *and/or* the variant allele was <10.

In the LS-SNV filter (**Table S2**) we replaced the stringent RepeatMasker/Segmental duplications filter with the UCSC Mappability track for 50-mers ([Raney et al. 2011](#_ENREF_10)) using only unique 50-mer mapping which leaves 77% of the genome for interrogation (**Table S1**). Additionally, we relaxed the requirement for ≥10 reads with the variant allele for a homozygous call and ≥10 reads for the reference allele *and* the variant allele for variants with a heterozygous genotype call to ≥6 reads. Together, this led to a lower detection limit of VAF = ~0.1. The impact of the separate filtering steps on the depth distribution of the selected variants is depicted in **Figure S8.**

***SM5 Indel filters***

The filters were as follows: (1) for the homozygous reference tissue, the variant-allele read depth was 0 for high stringency (HS-indel) and 1 for low stringency (LS-indel); (2) for the homozygous reference tissue, the read depth summed over both alleles was ≥ 12; and (3) for the heterozygous tissue, the read depth for each allele was ≥ 6.

With BFAST 0.7.0a ([Homer et al. 2009](#_ENREF_4)), the original SOLiD reads were mapped against the reference and variant alleles corresponding to the indels found by GATK, with perfect matches required in the mapping. We then used the BFAST read depths to reapply the three previous filters to the filtered GATK indels.

***SM6 Mutation Validation experiments***

Somatic mutation candidates were tested by targeted sequencing using the Ion Torrent PGM, with amplicon design performed using the AmpliSeq pipeline. The amplicons were sequenced to full length with a size range of 79-187 bases and an average mapped read depth ~2,000x. Validation was done not only for blood and brain tissues, but also for artery (media and endothelium), kidney (renal pyramid and minor calyx), heart, liver, lung, spleen, aorta, breast tumor, and gastric tumor. Samples were barcoded, and each library/emulsion PCR workflow was sequenced on two 318 chips. Reads were mapped and SNVs were genotyped with Torrent Suite v.2.2 (Life Technologies) and also manually by blindly genotyping variants with IGV ([Robinson et al. 2011](#_ENREF_11)). When the presence of variant alleles was detected in the IGV views but not by Torrent Suite (no call), the IGV genotyping and VAF values were regarded as more reliable. Therefore these were used for further analyses. Indels were called only from the IGV counts. Indels that could not be validated with Ion Torrent PGM sequencing because they mapped to repeat regions or occurred in homopolymer sequences were validated with Sanger sequencing.

***SM7 Consistency Filter***
To compare characteristics of the somatic mutations acquired in the healthy blood compartment with those of a random set of 10,000 germline variants from dbSNP (www.ncbi.nlm.nih.gov/SNP) and all 12,979 disease associated mutations from ClinVar (http://www.ncbi.nlm.nih.gov/ClinVar), we applied a consistency filter that included only those variants that mapped in the 50-mer mapability track ([Raney et al. 2011](#_ENREF_10)) and in regions with high read depth in the blood *and* the brain sequence (>20x read coverage in both). Of the 382 somatic mutations we removed four variants that did not map to the 50-mer mapability track (these were detected by the HS-SNV filter only, which filtered repetitive sequences by excluding regions in the Repeat Masker/Segmental Duplications). Additionally, we removed one variant that was germline in validation experiments and one that was inconclusive, leaving 376/382 somatic mutations. Likewise, the consistency filter left 7,242 of the 10,000 dbSNP variants and 8,189 of the 12,979 ClinVar variants for analysis.

***SM8 Comparison of characteristics between somatic mutations, dbSNP variants, and ClinVar variants***

For each set of variants, we determined the percentage of variants with a characteristic listed in **Table 2**. We tested if the percentage of somatic mutations either more closely resembled the percentage for dbSNP variants or for ClinVar variants. To compare the distances between these percentages we took their associated uncertainty into account by assuming that the number of mutations with a characteristic is distributed according to a binomial distribution with parameters (probability of a variant having the characteristic) and (number of variants in a set). The conjugate prior of is the Beta distribution, which describes the uncertainty in our estimate of . Starting from a non-informative parameterization ( and , the Jeffreys prior), the Beta distribution was updated with observations, such that

and

.

The resulting distribution reflects the reduced uncertainty in our estimate of . Next, we repeatedly sampled and from the corresponding Beta distributions. Distances between these samples were compared, and we counted how often was closer to than . The final probability (of the somatic mutations being more similar to dbSNP than ClinVar) was estimated by sampling 1,000,000 times.

***SM9 Variant enrichment/depletion in regions tracked by ENCODE***

To identify enrichment or depletion of a variant set for one of the ENCODE Peak tracks, we calculated an “ENCODE-score” by summing the track-values at the variant loci. Significance was determined by comparing this value with the ENCODE-scores of 1,000,000 equally sized sets of random loci, in which spatial dependencies of the variant loci were maintained by circularly shifting them across the genome. P-values were calculated by determining the proportion of permutations with an ENCODE-score higher (enrichment) or lower (depletion) than the ENCODE-score of variant loci.

Next, we compared ENCODE-scores between the somatic mutations, dbSNP and ClinVar variants that passed the consistency filter. The ENCODE-score for a variant collection A was compared to the ENCODE-scores of 1,000,000 random subsets from variant collection B with the size of collection A resulting in a p-value indicating represents the proportion of random subsets from collection B with a higher (enrichment) or lower (depletion) ENCODE-score than variant collection A. A low p-value indicates that the variants in collection A cannot be seen as a subset of the variants in collection B.

**Supplemental Figures**

**Figure S1: 801 SNVs with genotype difference in blood and brain sequence reads**

**A.** 801 SNVs detected with the HS-SNV filter that have a different genotype in blood and brain, depicted per genotype combination. X-axis: variant allele frequencies (VAFs) of the SNVs detected in the blood sequence reads; y-axis: VAFs of the SNVs detected in the brain sequence reads. Gray lines: the mean VAF of the germline heterozygous and homozygous SNVs with shared genotypes between blood and brain is shown for blood SNVs and for brain SNVs. Novel SNVs are indicated encircled in black. **B.** Fraction of known and novel SNVs for each genotype combination group, color coding as in A. **C**. Histograms of read depth at the loci of the 208 novel and 236 known SNVs detected heterozygous in blood but not in brain, compared with the depth of 368,979 loci of heterozygous germline SNVs. Top panel: blood; Bottom panel: brain.

**Figure S2: Results of first validation round**

**A.** The first validation experiment included 93 SNVs that were detected with the high stringency filter (HS-SNV) and 17 germline control variants. Variants for validation comprised a random pick from all genotype combinations and from the subgroup of novel variants heterozygous in blood and homozygous for the reference allele in brain. We prioritized variants in coding regions. **B.** Ion Torrent PGM sequencing of selected variants in the blood and brain genomes showed that VAF values in blood and brain were similar for most SNVs, indicating that they were germline. Those that were not similar were mostly novel SNVs detected in blood but not in brain. **C.** VAF values for Ion Torrent PGM read vs. VAF values for SOLiD reads. Blood: Ion Torrent PGM showed that VAF values were either 0 (no call, homozygous for the reference allele), ~0.5 (heterozygous), or ~1 (homozygous for the variant allele), except for the group of novel variants detected in blood and not in brain, which had approximately the same VAF for both methods. **D**. Idem in brain: the VAF values of the group of novel variants detected in blood but not in brain could not be depicted, because their VAF values were 0. **E.** For each genotype combination group the number of detected and tested variants is listed with their confirmed genotype and their dbSNP status.

**Figure S3: Depth histograms of known SNVs detected with a different genotype in blood and brain by the high stringency filter, per genotype combination**

**A.** Heterozygous SNVs detected in blood with the HS-SNV filter (**Table S3**): The mean read depths of the 236 known blood het; brain hom ref SNVs (39.2, green bars) and 143 blood het; brain hom var SNVs (38.3, blue bars) are significantly lower than the mean read depth in blood of the 358,809 heterozygous germline SNVs (62.9, red bars) (p= 1.87 x 10-97 and p= 2.99 x 10-64 respectively, one way ANOVA). **B**. Heterozygous SNVs detected in brain: The mean read depths of the 89 known blood hom ref; brain het SNVs (41.1, green bars) and 113 blood hom var; brain het SNVs (35.1, blue bars) are significantly lower than the mean read depth in brain of the 358,809 heterozygous germline SNVs (57.5, red bars) (p= 2.44 x 10-20

and p= 4.99 x 10-46 respectively, one way ANOVA). **C.** Homozygous SNVs detected in blood: The mean read depth of 113 known blood hom var; brain het variants (37.4, green bars) is significantly lower than the mean read depth in blood of 538,208 homozygous germline SNVs (51.5, red bars) (p= 3.47 x 10-17) one way ANOVA. No SNVs with the blood hom var; brain hom ref genotype were detected. **D.** Homozygous SNVs detected in brain: The mean read depth of 143 known blood het; brain hom var SNVs (33.8. green bars) is significantly lower than the mean read depth in brain of 538,208 homozygous shared variants (47.0, red bars) (p= 7.81 x 10-21). One blood hom ref; brain hom SNV was detected with a depth of 21 reads (blue bar).

**Figure S4. Mutations do not cluster at confined genomic locations**

The distribution of nearest neighbor distances of the somatic mutations and an exponential distribution (with parameter set to ).

**Figure S5. Complete enrichment / depletion analysis of somatic mutations in genomic elements tracked by ENCODE, GERP score**

**A.** *Y-axis: -*Log p-values indicate enrichment/depletion of somatic mutations, dbSNP variants and ClinVar variants for each functional genomic element assessed by ENCODE in GM12878 B-lymphocyte and H1 hESC embryonic stem cell lines (for dataset see **Table S9**). P-values for enrichment or depletion of somatic mutations and dbSNP variants were calculated by performing 1,000,000 permutations, limiting the most significant p-value to 1e-6, or –log p-value= 6. *Stars: somatic mutations and dbSNP variants are significantly enriched (above bars) or depleted (below bars) relative to ClinVar variants.* *Track not available for H1 hESC, track for H7es cell line used instead. **B.** GERP score (Genomic Evolutionary Rate Profiling) analysis: the distribution of the GERP scores for all variants in each group of variants.

**Figure S6. VAF values of confirmed somatic mutations**

**A:** VAF values of germline variants and somatic mutations. Moving average of VAF value frequencies, with window size of 0.02. *Gray*: 739,518 heterozygous germline SNVs determined by SOLiD whole genome sequencing in blood (a subset of the 756,141 heterozygous SNVs detected with the LS-SNV filter, with a total read depth ≥20). *Orange*: VAF values of the 382 “*highly likely*” somatic mutations (novel variants with high read depth): heterozygous SNVs in blood and homozygous for the reference allele in brain, and with high read depth ≥20 determined by SOLiD WGS. *Purple*: VAF values of 201 confirmed somatic mutations from the group of “*highly likely*” somatic mutations, determined by SOLiD WGS. *Black*: VAF values of 201 confirmed mutations by Ion Torrent PGM sequencing. VAF values of the peaks are shown. **B**. Mutations assigned to clone A and clone B (**Figure 4** of main manuscript) have similar percentages in genes, in methylated CpG and CpHpG sites or Lamina 1B Associated Domains (LADs).

**Figure S7. Copy number analysis W115 blood vs. brain**

Per chromosome blood vs. brain copy number analysis, copy number analysis for blood and brain genomes separately, and B-allele frequency for blood and brain genomes separately.

Chromosome 1 is presented; please download Holstege_Figure_S7.pdf in the Supplemental Material for copy number changes and B-allele representation for all chromosomes, this file is 31Mb.

**
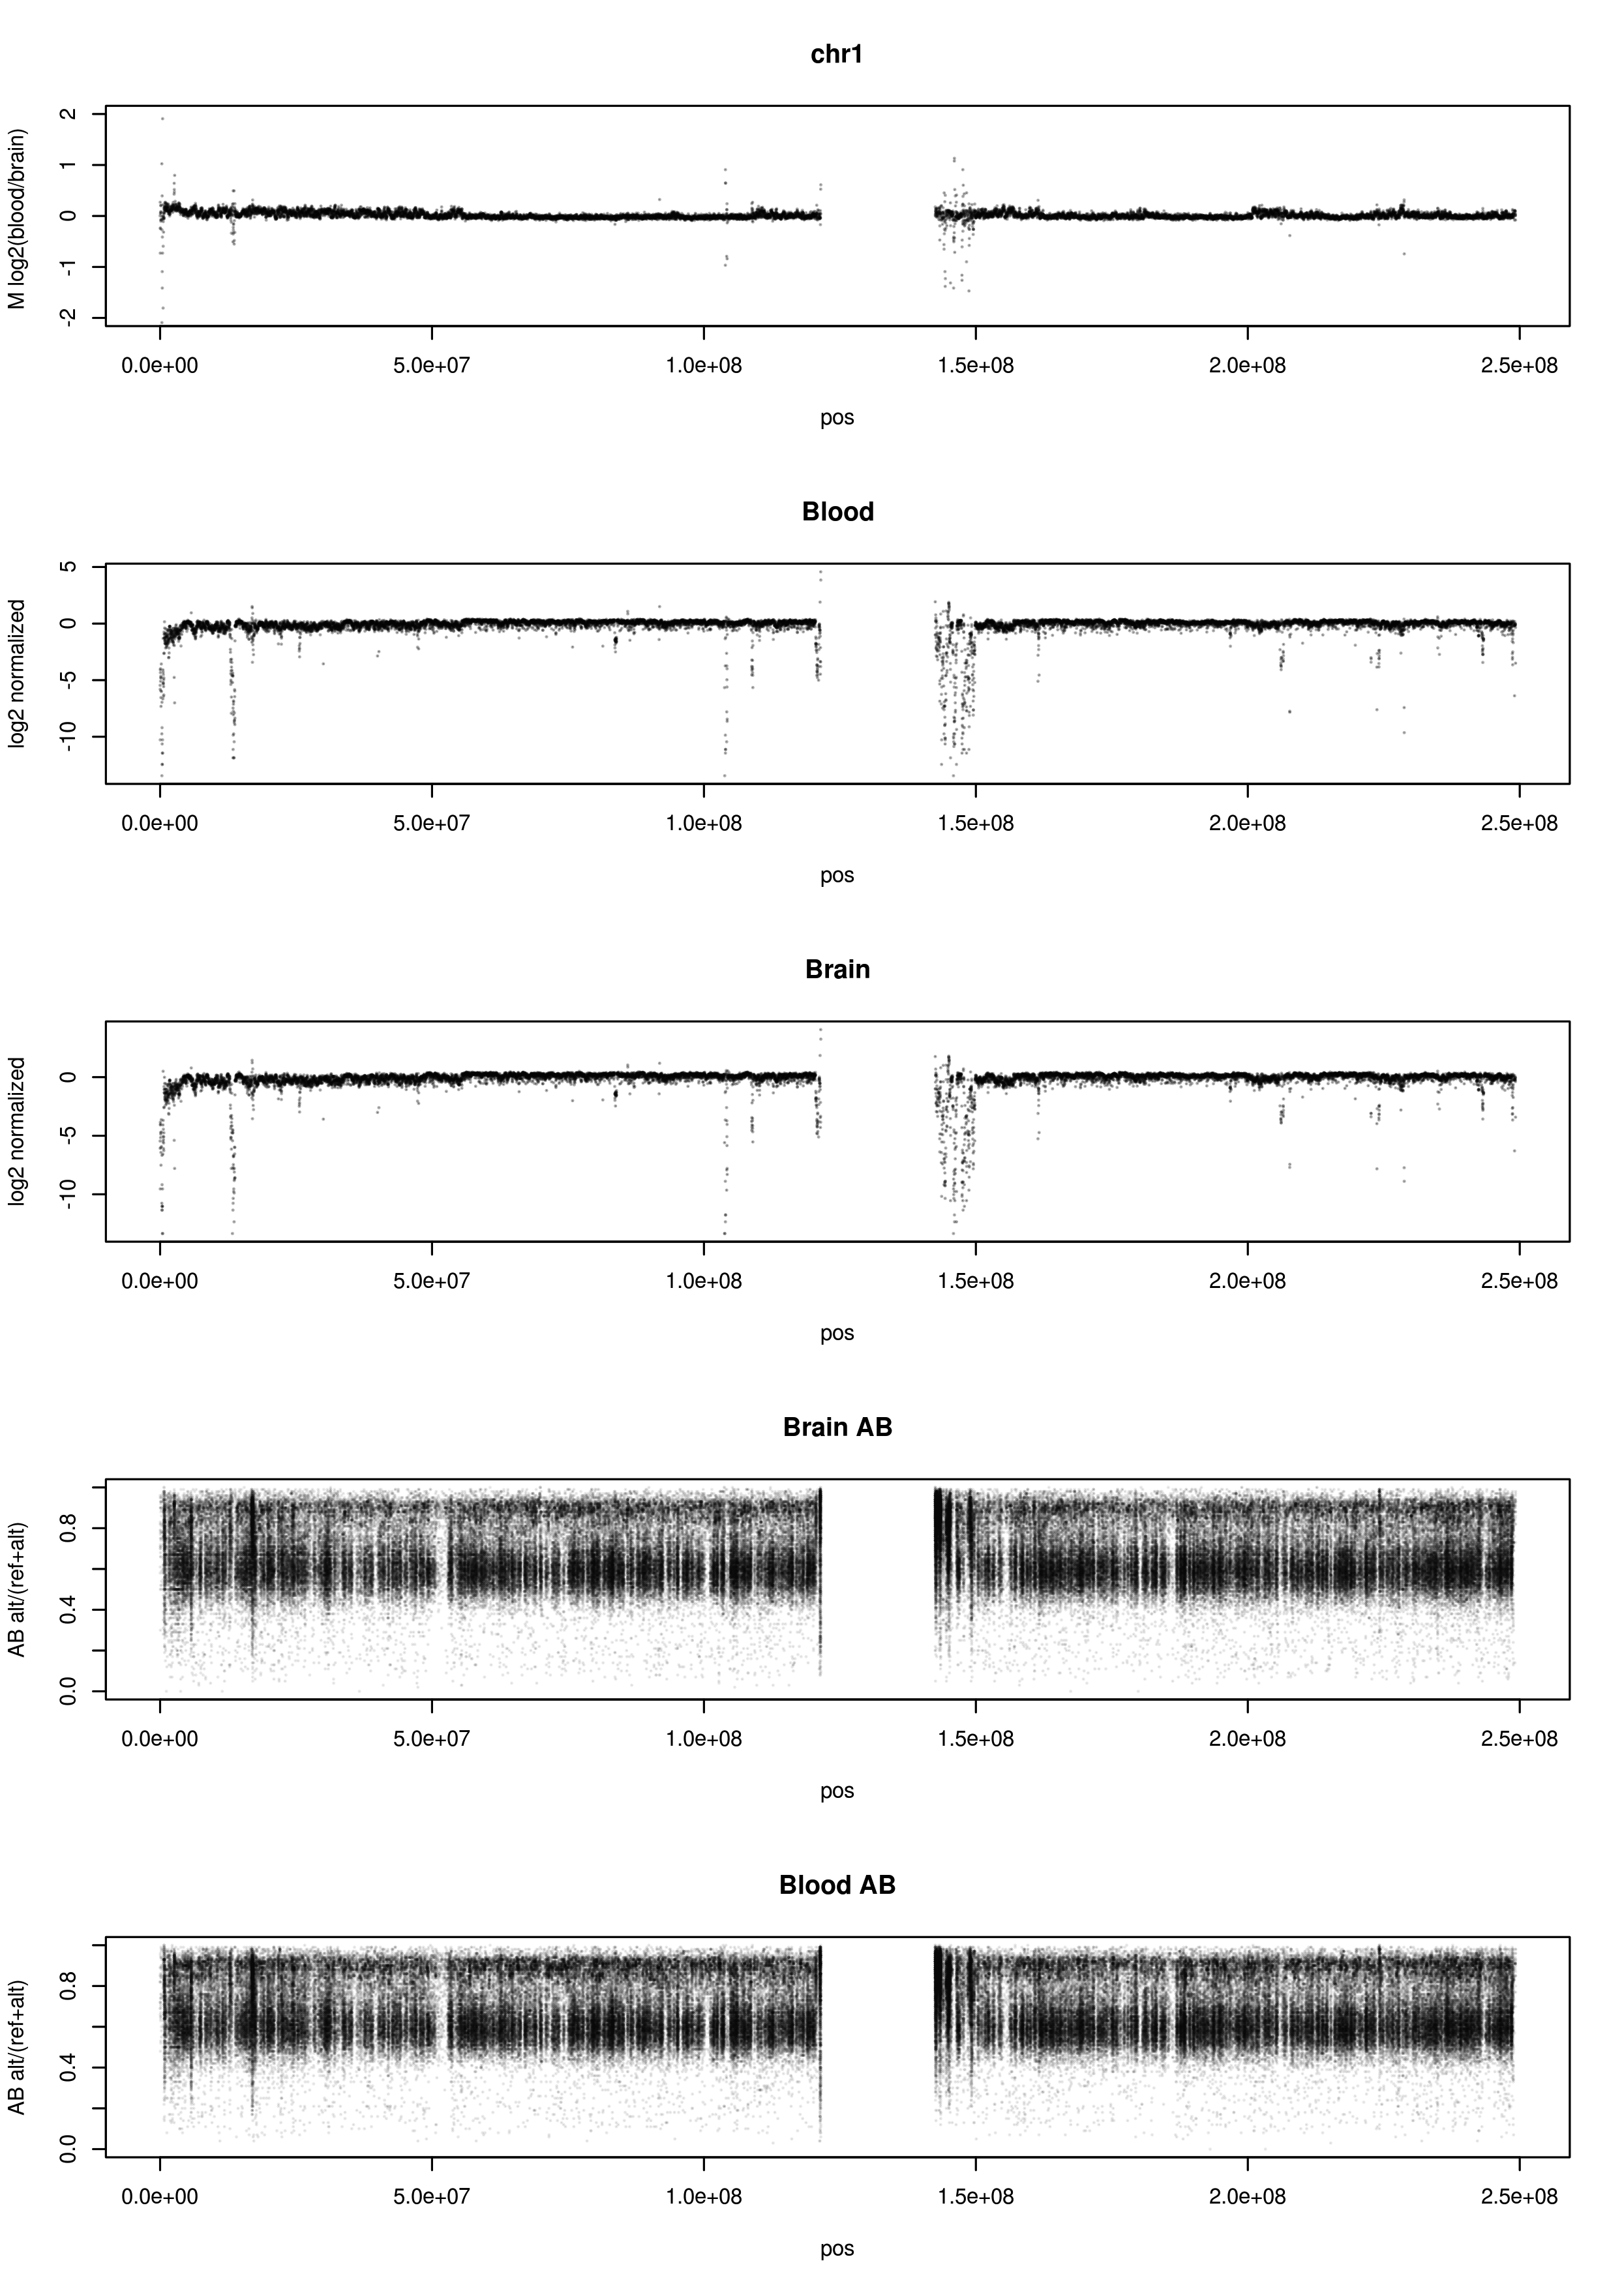
**

**Figure S8: Depth distribution of SNVs per filter step**

The impact of the separate filtering steps on the depth distribution of the selected variants. (The fraction of variants with GTblood ≠ GTbrain (gray and orange) is so small, its distribution is hardly visible in the plots.)

**Supplemental Tables**

**Table S1: Filter steps for HS- and LS-SNV filters**

| **Interrogable bases in genome** | **Interrogable bases** | | **Known to dbSNP1** | |
| --- | --- | --- | --- | --- |
|  | **total** | **%** | **total** | **%** |
| **Hg19, GRCh37 (primary assembly)** | 3,137,161,264 | 100% | NA | NA |
| **Hg19, GRCh37 (excluding gaps)** | 3,095,693,983 | 99% | 30,442,771 | 0.98% |
| **Interrogable Genome (excl N-bases)1** | 2,861,343,787 | 91% | 28,822,803 | 1.01% |
| **Remove Regions in Repeat Masker (RM)** | 1,395,619,013 | 44% | 13,162,087 | 0.94% |
| **Remove Regions in Segmental Duplications (SD)** | 2,695,251,495 | 86% | 27,528,661 | 1.02% |
| **Remove regions in RM & SD2** | 1,314,423,166 | 42% | 12,548,752 | 0.95% |
| **Retain: Unique 50-mer Mappability** | 2,381,548,144 | 76% | 24,365,178 | 1.02% |
|  |  |  |  |  |
| **High stringency filter (HS-SNV): Remove Regions in Repeat Masker (RM), corrected for ChrY3** | 1,368,851,872 | 45% | NA | NA |
| **Low stringency filter (LS-SNV):  Retain Unique 50-mer Mappability,**  **corrected for ChrY3** | 2,335,871,470 | 77% | NA | NA |
|  | | | | |

Starting with the whole Hg19 primary assembly, gaps and regions with ambiguous bases (N) were removed. The **HS-SNV filter** further eliminated: (a) repetitive sequences by filtering the genome with the RepeatMasker (RM) and with segmental duplications, leaving 45% of the genome for interrogation, (b) SNVs for which GATK and SAMtools differed in their genotype call for the same tissue, (c) SNVs with strand bias: (SP>5, SAMtools and FS>5, GATK), (d) SNVs with a homozygous genotype call with <10 reads and (e) SNVs with a heterozygous genotype call with <10 reads with the reference allele *and/or* the variant allele. The more relaxed **LS-SNV filter** was the same has the HS-SNV filter, but repetitive sequences were eliminated by the less stringent UCSC Mappability track for 50-mers ([Raney et al. 2011](#_ENREF_10)) leaving 77% of the genome for interrogation. Also, read-depth restrictions were relaxed by eliminating SNVs with <6 reads with a homozygous genotype call and <6 reads with the reference allele *and*/or the variant allele for variants with a heterozygous genotype call. GATK also called indels, of which some were putatively somatic in blood or brain. 1dbSNP build 132 from GATK bundle v1.2. 2There is overlap between the SD and RM tracks, 3GRCh37 excluding Chr Y: 3,0363,20,417 / 3,095,693,983 = 0.980620596

**Table S2: Filter steps for SNV detection**

| **Filter steps** | **HS-SNV** | | **LS-SNV** | |
| --- | --- | --- | --- | --- |
|  | **Total** | **%** | **Total** | **%** |
| **Detected SNVs: overlap GATK/SAMtools based on SNV location** | 3,265,602 | 100.0% | 3,265,602 | 100.0% |
| **Remove regions in Repeat Masker & Segmental Duplications** | 1,511,572 | 46.3% | NA | NA |
| **Retain SNVs in 50-mer Mappability** | NA | NA | 2,840,625 | 87.0% |
| **Remove non biallelic SNVs** | 1,503,152 | 46.0% | 2,824,482 | 86.5% |
| **Genotype concordance SAMtools and GATK** GTSAMtools,blood=GTGATK,blood AND GTSAMtools,brain=GTGATK,brain | 1,470,412 | 45.0% | 2,750,129 | 84.2% |
| **Strand Bias GATK:** SPblood AND SPbrain≤5 | 1,106,282 | 33.9% | 2,061,120 | 63.1% |
| **Strand Bias SAMtools:** FSblood AND FSbrain≤5 | 1,003,446 | 30.7% | 1,869,176 | 57.2% |
| **Read depth threshold 6** Heterozygous call: DepthREF ≥6 AND DepthVAR≥6 Homozygous call: DepthVAR≥6 | NA | NA | 1,794,615 | 55.0% |
| **Read depth threshold 10** Heterozygous call: DepthREF ≥10 AND DepthVAR≥10 Homozygous call: DepthVAR≥10 | 908,582 | 27.8% | NA | NA |
| **Remove chromosome Y** | 908,460 | 27.8% | 1,792,244 | 54.9% |
|  |  |  |  |  |
| **Germline:** GTblood=GTbrain | 907,659 | 27.79% | 1,786,739 | 54.71% |
| **Different:** GTblood ≠ GTbrain | 801 | 0.02% | 5,505 | 0.17% |

756 SNVs overlap between the HS-SNV and LS-SNV filters, while 45 SNVs only occur in the HS-SNV filter. Abbreviations: HS: High Stringency, LS: Low Stringency, RM: Repeat Mask (UCSC), SD: Segmental Duplications (UCSC), GT: genotype, SP: Phred-scaled strand bias P-value (SAMtools), FS: Fisher Strand, Phred-scaled p-value using Fisher’s Exact Test to detect strand bias (GATK).

**Table S3: SNVs detected with high and low stringency filters**

| **A. High stringency SNV filter** | **Genotype combination** | **n** | **%** | **Known** | **%** | **Novel** | **%** |
| --- | --- | --- | --- | --- | --- | --- | --- |
| **Germline GT blood = GT brain** | hom var | 538,680 | 59.3% | 538,208 | 99.9% | 472 | 0.1% |
| het | 368,979 | 40.7% | 358,809 | 97.2% | 10,170 | 2.8% |
|  | **total** | **907,659** | **100.0%** | **897,017** | **98.8%** | **10,642** | **1.2%** |
|  |  |  |  |  |  |  |  |
| **Putative somatic mutations GT blood ≠ GT brain** | blood het; brain hom ref | 444 | 55.4% | 236 | 53.2% | 208 | 46.8% |
| blood het; brain hom var | 144 | 18.0% | 143 | 99.3% | 1 | 0.7% |
| blood hom ref; brain het | 98 | 12.2% | 89 | 90.8% | 9 | 9.2% |
| blood hom var; brain het | 114 | 14.2% | 113 | 99.1% | 1 | 0.9% |
| blood hom ref; brain hom var | 1 | 0.1% | 1 | 100.0% | 0 | 0.0% |
| blood hom var; brain hom ref | 0 | 0.0% | 0 | NA | 0 | NA |
|  | **Total** | **801** | **100.0%** | **582** | **72.7%** | **219** | **27.3%** |
|  |  |  |  |  |  |  |  |
| **TOTAL** |  | **908,460** |  | **897,599** | **98.80%** | **10,861** | **1.20%** |
|  |  |  |  |  |  |  |  |
|  |  |  |  |  |  |  |  |
| **B. Low stringency SNV filter** | **Genotype combination** | **n** | **%** | **Known** | **%** | **Novel** | **%** |
| **Germline GT blood = GT brain** | hom var | 1,030,598 | 57.7% | 1,029,071 | 99.9% | 1,527 | 0.1% |
| het | 756,141 | 42.3% | 733,054 | 96.9% | 23,087 | 3.1% |
|  | **Total** | **1,786,739** | **100.0%** | **1,762,125** | **98.6%** | **24,614** | **1.4%** |
|  |  |  |  |  |  |  |  |
| **Putative somatic mutations GT blood ≠ GT brain** | blood het; brain hom ref | 2,108 | 38.3% | 1,552 | 73.6% | 556 | 26.4% |
| blood het; brain hom var | 1,117 | 20.3% | 1,090 | 97.6% | 27 | 2.4% |
| blood hom ref; brain het | 1,238 | 22.5% | 1,105 | 89.3% | 133 | 10.7% |
| blood hom var; brain het | 1,022 | 18.6% | 1,007 | 98.5% | 15 | 1.5% |
| blood hom ref; brain hom var | 7 | 0.1% | 7 | 100.0% | 0 | 0.0% |
| blood hom var; brain hom ref | 13 | 0.2% | 11 | 84.6% | 2 | 15.4% |
|  | **Total** | **5,505** | **100.0%** | **4,772** | **86.7%** | **733** | **13.3%** |
|  |  |  |  |  |  |  |  |
| **TOTAL** |  | **1,792,244** |  | **1,766,897** | **98.59%** | **25,347** | **1.41%** |

SNVs detected with **A.** the high stringency filter: repetitive regions were filtered with the Repeat Masker and Segmental Duplications, ≥10 variant reads for a homozygous call, and ≥10 variant + ≥10 reference reads for a heterozygous call, **B**. the low stringency filter: repetitive regions were filtered with the 50mer mapability filter, ≥6 variant reads for a homozygous call, and ≥6 variant + ≥6 reference reads for a heterozygous call. Top panels denote the germline SNVs; bottom panels denote the SNVs that were detected with a different genotype call between blood and brain by both the GATK and SAMtools variant callers. Novel and known SNVs are shown separately. The number of heterozygous germline variants is lower than the number of homozygous variants because the depth requirement to detect a heterozygous variant is twice as high. Abbreviations: hom: homozygous; het: heterozygous; var: variant genotype; ref: reference genotype.

**Table S4: Validation experiments by Ion Torrent PGM sequencing**

|  | | | | | | | |
| --- | --- | --- | --- | --- | --- | --- | --- |
| **SNVs** |  |  |  | **1st validation (HS filter)** | **2nd validation round (HS and/or LS filters)** | **TOTAL** |
| Blood candidate mutations (blood het; brain hom ref, n=612) | | | | 50 | 206 | 256 |
| Brain candidate mutations (blood hom ref; brain het, n=107) | | | | 1 | 18 | 19 |
| SNVs with other genotype combinations | | | | 42 | 2 | 44 |
| **Subtotal** | | | | **93** | **226** | **319** |
|  | | | |  |  |  |
| het and hom controls | | | | 17 | 0 | 17 |
| Validation result inconclusive | | | | 2 | 5 | 7 |
| **TOTAL** | | | | **112** | **231** | **343** |
|  | | | | | | | |
| **Indels** |  |  |  | **Tested** | | | |
| Blood: 30 candidate mutations | | | | 23 | | | |
| Brain: 3 candidate mutations | | | | 0 | | | |
| Control: germline variants | | | | 83 | | | |
| **TOTAL** | | | | **106** | | | |

Validation experiments: number of detected SNVs and indels tested for genotype by Ion Torrent PGM sequencing. Candidate mutations: SNVs detected heterozygous in blood and brain tissue by the high stringency (HS) and/or low stringency (LS) filters.

**Table S5: Somatic indel detection and validation**

| **Indels** | **Candidate somatic indels in blood** | | **Candidate somatic indels in brain** | | **Germline** | **Total** |
| --- | --- | --- | --- | --- | --- | --- |
| Called by GATK | 5,335 | | 4,314 | | 314,914 | 324,563 |
|  |  |  |  |  |  |  |
|  | **HS-indel** | **LS-indel** | **HS-indel** | **LS-indel** |  |  |
| Passed three filters for GATK | 1,085 | 954 | 715 | 464 | NA | 3,218 |
| Passed three filters for both GATK and BFAST | 19 | 11 | 0 | 3 | NA | 33 |
| Validated | 18 | 5 | 0 | 0 | 83 | 106 |
| **Confirmed somatic mutation** | **18** | **4** | **0** | **0** | 0 | **22** |

Filters were designed assuming that the somatic tissue is heterozygous and the other tissue is homozygous reference, i.e., neither tissue is homozygous variant. Read-depth filters: **1)** For the homozygous reference tissue, the GATK or BFAST variant allele read-depth was 0 for high stringency (HS) and 1 for low stringency (LS). Indels that passed the HS filters for GATK and the LS filters for BFAST, or vice versa, were categorized as passing the LS filters. **2)** For the homozygous reference tissue, the GATK or BFAST read-depth summed over both alleles was ≥ 12. **3)** For the heterozygous tissue, the GATK or BFAST read-depth for each allele was ≥ 6.

**Table S6: Validation list of 343 tested single nucleotide variants**

XLS file

**Table S7:** **Validation list of 33 tested indels that passed three filters for both GATK and BFAST**

XLS file:

**Table S8**: **382 “*highly likely*” somatic mutations**

XLS file

**Table S9: ENCODE analysis results**

XLS file

**Table S10: Gaussian fit parameters corresponding to the VAF peaks**

| Component | (mean) | (mean) | (mean) | 95% HPD interval | 95% HPD  Clonal % in peripheral blood |
| --- | --- | --- | --- | --- | --- |
| 1 | 0.22 | 0.035 | 0.616 | 0.213-0.228 | 42.6%-45.6% |
| 2 | 0.33 | 0.043 | 0.382 | 0.316-0.340 | 63.2%-68.0% |
| 3 | 0.25 | 1e+58 | 0.002 | 0.022-0.496 | 4.4% - 100% |

**Table S11: Damaging variants in genes associated with DNA repair in W115 genome**

| **Gene** | **Genomic position,  reference allele** | **dbSNP ID alternate allele** | **PolyPhen prediction** | **SIFT prediction** | **Genotype** | **Clinical significance (dbSNP)** | **MAF  (1000 Genomes Phase1)** |
| --- | --- | --- | --- | --- | --- | --- | --- |
| EXO1 | chr1:242045275, C | rs1635498:T | possibly damaging | TOLERATED | het | NA | *C=0.084/183* |
| LIG4 | chr13:108863591, G | rs1805388:A | possibly damaging | TOLERATED | het | reduction in risk of developing multiple myeloma, gene dosage effect. http://omim.org/entry/601837#0005 | A=0.154/335 |
| BRCA1 | chr17:41244435 | rs16941:C | possibly damaging | DAMAGING | het | nonpathogenic | C=0.303/661 |
| BRCA2 | chr13:32929387, T | novel:C | possibly damaging | TOLERATED | hom | NA (novel) | NA (novel) |
| CHAF1A | chr19:4442336, C | rs9352:T | possibly damaging | TOLERATED | hom | NA | *C=0.425/926* |
| XRCC1 | chr19:44081288, A | novel:G | possibly damaging | TOLERATED | hom | NA (novel) | NA (novel) |
| RNF168 | chr3:196199204, G | rs3796129:T | possibly damaging | TOLERATED | hom | NA | T=0.400/871 |
| WRN | chr8:31024654, T | rs1346044:C | possibly damaging | TOLERATED | het | NA | C=0.183/398 |
| POLL | chr10:103340056, G | rs3730477:A | probably damaging | DAMAGING | het | NA | A=0.117/254 |
| DCLRE1A | chr10:115609915, C | rs3750898:G | probably damaging | TOLERATED | het | NA | *C=0.301/656* |
| RAD50 | chr5:131915673, G | rs28903088:A | probably damaging | DAMAGING | het | NA | A=? |
| CCNH | chr5:86695274, A | rs2230641:G | probably damaging | TOLERATED | het | NA | G=0.138/301 |
| PKD1L1 | chr7:47851623, C | novel:T | probably damaging | TOLERATED | hom | NA (novel) | NA (novel) |
| PKD1L1 | chr7:47968927, C | rs2686817:A | probably damaging | DAMAGING | hom | NA | A=0.493/1073 |

Underlined italics: Hg19 reference genome reports minor allele, W115 has major allele

**Supplementary References**

Bailey JA, Gu Z, Clark RA, Reinert K, Samonte RV, Schwartz S, Adams MD, Myers EW, Li PW, Eichler EE. 2002. Recent segmental duplications in the human genome. *Science* **297**(5583): 1003-1007.

den Dunnen WF, Brouwer WH, Bijlard E, Kamphuis J, van Linschoten K, Eggens-Meijer E, Holstege G. 2008. No disease in the brain of a 115-year-old woman. *Neurobiol Aging* **29**(8): 1127-1132.

DePristo MA, Banks E, Poplin R, Garimella KV, Maguire JR, Hartl C, Philippakis AA, del Angel G, Rivas MA, Hanna M et al. 2011. A framework for variation discovery and genotyping using next-generation DNA sequencing data. *Nat Genet* **43**(5): 491-498.

Homer N, Merriman B, Nelson SF. 2009. BFAST: an alignment tool for large scale genome resequencing. *PloS one* **4**(11): e7767.

Kumar P, Henikoff S, Ng PC. 2009. Predicting the effects of coding non-synonymous variants on protein function using the SIFT algorithm. *Nat Protoc* **4**(7): 1073-1081.

Li H, Handsaker B, Wysoker A, Fennell T, Ruan J, Homer N, Marth G, Abecasis G, Durbin R. 2009. The Sequence Alignment/Map format and SAMtools. *Bioinformatics* **25**(16): 2078-2079.

Life_Technologies. 2010.

Applied Biosystems SOLiD™ System BioScope™ Software for Scientists Guide, Data Analysis Methods and Interpretation.

McKenna A, Hanna M, Banks E, Sivachenko A, Cibulskis K, Kernytsky A, Garimella K, Altshuler D, Gabriel S, Daly M et al. 2010. The Genome Analysis Toolkit: a MapReduce framework for analyzing next-generation DNA sequencing data. *Genome Res* **20**(9): 1297-1303.

Ng SB, Turner EH, Robertson PD, Flygare SD, Bigham AW, Lee C, Shaffer T, Wong M, Bhattacharjee A, Eichler EE et al. 2009. Targeted capture and massively parallel sequencing of 12 human exomes. *Nature* **461**(7261): 272-276.

Raney BJ, Cline MS, Rosenbloom KR, Dreszer TR, Learned K, Barber GP, Meyer LR, Sloan CA, Malladi VS, Roskin KM et al. 2011. ENCODE whole-genome data in the UCSC genome browser (2011 update). *Nucleic Acids Res* **39**(Database issue): D871-875.

Robinson JT, Thorvaldsdottir H, Winckler W, Guttman M, Lander ES, Getz G, Mesirov JP. 2011. Integrative genomics viewer. *Nature biotechnology* **29**(1): 24-26.

Smedley D, Haider S, Ballester B, Holland R, London D, Thorisson G, Kasprzyk A. 2009. BioMart--biological queries made easy. *BMC Genomics* **10**: 22.

Thorvaldsdottir H, Robinson JT, Mesirov JP. 2012. Integrative Genomics Viewer (IGV): high-performance genomics data visualization and exploration. *Briefings in bioinformatics*.
