# Supplementary material for: Somatic mutations found in the healthy blood compartment of a 115-yr-old woman demonstrate oligoclonal hematopoiesis
Source: HighWire-hosted journal article supplement (doi:10.1101/gr.162131.113), 2014-04-23
Supplement: Table_S9.xlsx [file Table_S9.xlsx]

## Sheet: TABLE S9 
Encode tracks	replicates	Encode_file_type	Encode_experiment	Encode_test_factor	genome_length_all	genome_covered_all	genome_coverage_all	snps_tested	som_mut_pvalues_enrichment	som_mut_pvalues_depletion	dbSNP_pvalues_enrichment	dbSNP_pvalues_depletion	ClinVar_pvalues_enrichment	dbSNP_pvalues_depletion	genome_length_tested	genome_covered_tested	genome_coverage_tested	som_mut_tested	som_mut_covered	som_mut_uncovered	som_mut_coverage	dbSNP_tested	dbSNP_covered	dbSNP_uncovered	dbSNP_coverage	ClinVar_tested	ClinVar_covered	ClinVar_uncovered	ClinVar_coverage	p_values_enrichment_(som_mut_vs_ClinVar)	p_values_depletion_(som_mut_vs_ClinVar)	p_values_enrichment_(som_mut_vs_dbSNP)	p_values_depletion_(som_mut_vs_dbSNP)	p_values_enrichment_(dbSNP_vs_ClinVar)	p_values_depletion_dbSNP_vs_ClinVar)
CD34_DNAseI_EIO_JCVI_CD34_NAS.txt	1	txt	CD34DNAseI	CD34DNAseI	3095677412	19575665	0.00632355	376	0.154096	0.942372	0.043378	0.967818	0.013313	0.98802	2247477802	12338910	0.00549011	376	4	372	0.0106383	7996	56	7940	0.0070035	8189	76	8113	0.00928074	0.238099	0.761905	0.275057	0.928538	0.999999	0.004133
cpgIslandExt.txt	1	txt	cpgIslandExt	cpgIslandExt	3095677412	21152388	0.00683288	376	0.326756	0.676813	0.930646	0.070199	2.7e-05	0.999972	2247477802	2650806	0.00117946	376	1	375	0.00265957	7996	5	7991	0.000625313	8189	129	8060	0.0157528	1	1e-06	0.191558	0.821509	1	1e-06
laminB1Lads.txt	1	txt	laminB1Lads	laminB1Lads	3095677412	1140974060	0.36857	376	3.4e-05	0.999972	2e-06	0.999991	0.999997	5e-06	2247477802	940314589	0.418387	376	204	172	0.542553	7996	3609	4387	0.451351	8189	2187	6002	0.267066	1e-06	1	0.001287	0.997374	1e-06	1
wgEncodeRegDnaseClustered.bed	1	bed	RegDnaseClustered	RegDnaseClustered	3095677412	271942000	0.0878457	376	0.429846	0.569119	0.455937	0.543152	0.3028	0.696656	2247477802	236657964	0.105299	376	38	338	0.101064	7996	815	7181	0.101926	8189	1029	7160	0.125656	0.530869	0.470589	0.352688	0.6233	0.925211	0.076576
wgEncodeRegTfbsClusteredV2.bed	1	bed	TfbsClusteredV2	TfbsClusteredV2	3095677412	225414306	0.0728158	376	0.544225	0.457092	0.57532	0.42524	1e-06	1	2247477802	186437134	0.0829539	376	36	340	0.0957447	7996	661	7335	0.0826663	8189	1239	6950	0.151301	1	1e-06	0.513657	0.519872	1	1e-06
cytoBandIdeo.txt	1	txt	cytoband	Giemsa Staining	3095677412	3095677412	1	376	0.000675	0.999309	0.499919	0.501501	0.999814	0.000199	2247477802	2247477802	1	376	376	0	1	7996	7996	0	1	8189	8189	0	1	1e-06	1	0.01566	0.987067	1e-06	1
wgEncodeBuOrchidV2.bedGraph	1	bedGraph	BuOrchid V2	BuOrchid V2	3095677412	2861210162	0.92426	376	1e-06	1	1e-06	1	1e-06	1	2247477802	2247384566	0.999959	376	376	0	1	7996	7996	0	1	8189	8189	0	1	0.634147	0.363635	2e-06	0.997131	1	1e-06
Human Embryonic Stem Cell line: H1hesc
Encode tracks	replicates	Encode_file_type	Encode_experiment	Encode_test_factor	genome_length_all	genome_covered_all	genome_coverage_all	snps_tested	som_mut_pvalues_enrichment	som_mut_pvalues_depletion	dbSNP_pvalues_enrichment	dbSNP_pvalues_depletion	ClinVar_pvalues_enrichment	dbSNP_pvalues_depletion	genome_length_tested	genome_covered_tested	genome_coverage_tested	som_mut_tested	som_mut_covered	som_mut_uncovered	som_mut_coverage	dbSNP_tested	dbSNP_covered	dbSNP_uncovered	dbSNP_coverage	ClinVar_tested	ClinVar_covered	ClinVar_uncovered	ClinVar_coverage	p_values_enrichment_(som_mut_vs_ClinVar)	p_values_depletion_(som_mut_vs_ClinVar)	p_values_enrichment_(som_mut_vs_dbSNP)	p_values_depletion_(som_mut_vs_dbSNP)	p_values_enrichment_(dbSNP_vs_ClinVar)	p_values_depletion_dbSNP_vs_ClinVar)
wgEncodeHaibMethylWgbsH1hescCpGSites.bed	1	bed	HaibMethylWgbs	CpG Sites	3095677412	51542093	0.0166497	376	1e-06	1	1e-06	1	1e-06	1	2247477802	32147043	0.0143036	376	62	314	0.164894	7996	1109	6887	0.138694	8189	2424	5765	0.296007	1	1e-06	0.025648	0.967549	1	1e-06
wgEncodeHaibMethylWgbsH1hescNonCpGSites.bed	1	bed	HaibMethylWgbs	NonCpG Sites	3095677412	1044987310	0.337563	376	0.023291	0.977065	0.110655	0.889782	1e-06	1	2247477802	838531537	0.373099	376	164	212	0.43617	7996	3057	4939	0.382316	8189	3184	5005	0.388814	0.309527	0.81817	0.09302	0.90423	1	0.000653
wgEncodeBroadHistoneH1hescChd1a301218aStdPk.broadPeak	1	broadPeak	wgEncodeBroadHistone	Chd1	3095677412	492270880	0.159019	376	0.399432	0.598581	0.532695	0.467691	0.399432	0.598581	2247477802	399357414	0.177691	376	63	313	0.167553	7993	1429	6564	0.178781	8189	63	8126	0.00769325	1	1e-06	0.311545	0.50052	0.997437	0.003329
wgEncodeBroadHistoneH1hescChd7a301223a1Pk.broadPeak	1	broadPeak	wgEncodeBroadHistone	Chd7	3095677412	729526729	0.23566	376	0.689482	0.310347	0.676643	0.322738	0.689482	0.310347	2247477802	585990616	0.260733	376	88	288	0.234043	7993	2090	5903	0.261479	8189	88	8101	0.0107461	1	0.012499	0.584556	0.431636	1	1e-06
wgEncodeBroadHistoneH1hescCtcfStdPk.broadPeak	1	broadPeak	wgEncodeBroadHistone	Ctcf	3095677412	119330834	0.0385476	376	0.581187	0.418527	0.037848	0.962543	0.000711	0.999312	2247477802	90285684	0.040172	376	16	360	0.0425532	7993	360	7633	0.0450394	8189	617	7572	0.075345	0.975411	1e-06	0.513467	0.470159	0.998639	0.000919
wgEncodeBroadHistoneH1hescEzh239875Pk.broadPeak	1	broadPeak	wgEncodeBroadHistone	Ezh2	3095677412	348281103	0.112506	376	0.876384	0.123451	0.753257	0.246709	0.002489	0.99764	2247477802	277595730	0.123514	376	39	337	0.103723	7993	993	7000	0.124234	8189	1480	6709	0.18073	1	1e-06	0.759772	0.251542	1	1e-06
wgEncodeBroadHistoneH1hescH2azStdPk.broadPeak	1	broadPeak	wgEncodeBroadHistone	H2az	3095677412	874384247	0.282453	376	0.055109	0.944346	0.014383	0.985539	0.998077	0.001911	2247477802	760672084	0.338456	376	149	227	0.396277	7993	2862	5131	0.358063	8189	1917	6272	0.234095	1e-06	1	0.219333	0.772196	1e-06	1
wgEncodeBroadHistoneH1hescH3k09me3StdPk.broadPeak	1	broadPeak	wgEncodeBroadHistone	H3k9me3	3095677412	434857334	0.140472	376	0.446402	0.554391	0.047576	0.952739	0.999986	1.2e-05	2247477802	352487491	0.156837	376	55	321	0.146277	7993	1366	6627	0.1709	8189	659	7530	0.0804738	1e-06	0.975611	0.670566	0.320267	1e-06	1
wgEncodeBroadHistoneH1hescH3k27acStdPk.broadPeak	1	broadPeak	wgEncodeBroadHistone	H3k27ac	3095677412	514343228	0.166149	376	0.944618	0.055094	0.951871	0.048513	0.000735	0.99924	2247477802	415083576	0.184689	376	60	316	0.159574	7993	1423	6570	0.178031	8189	2376	5813	0.290145	1	1e-06	0.820027	0.175433	0.990162	0.010743
wgEncodeBroadHistoneH1hescH3k27me3StdPk.broadPeak	1	broadPeak	wgEncodeBroadHistone	H3k27me3	3095677412	218635559	0.0706261	376	0.981424	0.018664	0.430196	0.569968	0.00557	0.994576	2247477802	166812819	0.0742222	376	24	352	0.0638298	7993	650	7343	0.0813212	8189	902	7287	0.110148	1	1e-06	0.916316	0.081262	1	1e-06
wgEncodeBroadHistoneH1hescH3k36me3StdPk.broadPeak	1	broadPeak	wgEncodeBroadHistone	H3k36me3	3095677412	485550501	0.156848	376	0.968082	0.031533	0.999999	1e-06	1.6e-05	0.999992	2247477802	391636060	0.174256	376	54	322	0.143617	7993	1214	6779	0.151883	8189	3742	4447	0.456954	1	1e-06	0.716463	0.306911	1	1e-06
wgEncodeBroadHistoneH1hescH3k4me1StdPk.broadPeak	1	broadPeak	wgEncodeBroadHistone	H3k4me1	3095677412	406874763	0.131433	376	0.996706	0.00332	0.709836	0.289635	0.00116	0.998847	2247477802	329838712	0.146759	376	36	340	0.0957447	7993	1160	6833	0.145127	8189	1536	6653	0.187569	1	1e-06	0.954444	0.03802	0.999999	1e-06
wgEncodeBroadHistoneH1hescH3k4me2StdPk.broadPeak	1	broadPeak	wgEncodeBroadHistone	H3k4me2	3095677412	150493463	0.0486141	376	0.721959	0.278651	0.999434	0.000581	0.000228	0.999764	2247477802	108851794	0.0484329	376	16	360	0.0425532	7993	328	7665	0.0410359	8189	708	7481	0.0864574	1	1e-06	0.4831	0.507233	1	1e-06
wgEncodeBroadHistoneH1hescH3k4me3StdPk.broadPeak	1	broadPeak	wgEncodeBroadHistone	H3k4me3	3095677412	102929805	0.0332495	376	0.773175	0.227412	0.999213	0.000743	0.001606	0.998447	2247477802	68043737	0.0302756	376	7	369	0.018617	7993	215	7778	0.0268985	8189	420	7769	0.0512883	0.999999	0.041665	0.562786	0.447158	1	1e-06
wgEncodeBroadHistoneH1hescH3k79me2StdPk.broadPeak	1	broadPeak	wgEncodeBroadHistone	H3k79me2	3095677412	324847992	0.104936	376	0.946421	0.053756	0.999993	8e-06	0.003462	0.996561	2247477802	262172815	0.116652	376	33	343	0.087766	7993	770	7223	0.0963343	8189	1239	6950	0.151301	1	1e-06	0.65293	0.355237	1	1e-06
wgEncodeBroadHistoneH1hescH3k9acStdPk.broadPeak	1	broadPeak	wgEncodeBroadHistone	H3k9ac	3095677412	376474191	0.121613	376	0.561196	0.438802	0.983463	0.016618	0.000498	0.999494	2247477802	295277520	0.131382	376	46	330	0.12234	7993	1026	6967	0.128362	8189	1919	6270	0.234339	1	1e-06	0.417717	0.54926	0.999251	1e-06
wgEncodeBroadHistoneH1hescH4k20me1StdPk.broadPeak	1	broadPeak	wgEncodeBroadHistone	H4k20me1	3095677412	623709618	0.201478	376	0.966634	0.033167	0.999987	1.5e-05	8.7e-05	0.999912	2247477802	501600860	0.223184	376	71	305	0.18883	7993	1590	6403	0.198924	8189	3756	4433	0.458664	1	1e-06	0.695967	0.285225	1	1e-06
wgEncodeBroadHistoneH1hescHdac2a300705aPk.broadPeak	1	broadPeak	wgEncodeBroadHistone	Hdac2	3095677412	412242872	0.133167	376	0.864652	0.134942	0.487228	0.513235	4.2e-05	0.999965	2247477802	318720007	0.141812	376	43	333	0.114362	7993	1149	6844	0.143751	8189	1714	6475	0.209305	1	1e-06	0.764985	0.227908	1	1e-06
wgEncodeBroadHistoneH1hescHdac6a301341aPk.broadPeak	1	broadPeak	wgEncodeBroadHistone	Hdac6	3095677412	894618387	0.28899	376	0.986208	0.013644	0.084772	0.915213	4.6e-05	0.999967	2247477802	718137686	0.31953	376	102	274	0.271277	7993	2625	5368	0.328412	8189	3793	4396	0.463182	1	1e-06	0.963374	0.040754	1	1e-06
wgEncodeBroadHistoneH1hescJarid1aab26049StdPk.broadPeak	1	broadPeak	wgEncodeBroadHistone	Jarid1a	3095677412	309884864	0.100102	376	0.459459	0.540485	0.113677	0.886442	0.000501	0.999473	2247477802	257444849	0.114548	376	42	334	0.111702	7993	963	7030	0.12048	8189	1542	6647	0.188301	1	0.051281	0.500807	0.499982	1	1e-06
wgEncodeBroadHistoneH1hescJmjd2aa300861a1Pk.broadPeak	1	broadPeak	wgEncodeBroadHistone	Jmjd2a	3095677412	146668009	0.0473783	376	0.872111	0.128132	0.898262	0.102366	0.001945	0.997941	2247477802	102233488	0.0454881	376	10	366	0.0265957	7993	384	7609	0.048042	8189	592	7597	0.0722921	1	1e-06	0.712223	0.272734	1	1e-06
wgEncodeBroadHistoneH1hescP300kat3bPk.broadPeak	1	broadPeak	wgEncodeBroadHistone	P300	3095677412	650604898	0.210166	376	0.743456	0.25629	0.023076	0.976856	6e-05	0.999937	2247477802	513942777	0.228675	376	79	297	0.210106	7993	1924	6069	0.240711	8189	3103	5086	0.378923	1	1e-06	0.761307	0.26962	1	1e-06
wgEncodeBroadHistoneH1hescPhf8a301772aPk.broadPeak	1	broadPeak	wgEncodeBroadHistone	Phf8	3095677412	322485692	0.104173	376	0.559972	0.440101	0.831906	0.168793	0.00126	0.998685	2247477802	246291608	0.109586	376	38	338	0.101064	7993	898	7095	0.112348	8189	1398	6791	0.170717	1	0.047619	0.457736	0.567469	1	1e-06
wgEncodeBroadHistoneH1hescPlu1Pk.broadPeak	1	broadPeak	wgEncodeBroadHistone	Plu1	3095677412	1018214566	0.328915	376	0.895879	0.104266	0.041018	0.959071	0.0002	0.999805	2247477802	826989376	0.367963	376	126	250	0.335106	7993	3050	4943	0.381584	8189	4044	4145	0.493833	1	1e-06	0.894221	0.11785	1	1e-06
wgEncodeBroadHistoneH1hescRbbp5a300109aStdPk.broadPeak	1	broadPeak	wgEncodeBroadHistone	Rbbp5	3095677412	325538526	0.105159	376	0.323222	0.676626	0.651456	0.349164	9.6e-05	0.999904	2247477802	247838017	0.110274	376	40	336	0.106383	7993	921	7072	0.115226	8189	1807	6382	0.220662	1	1e-06	0.319705	0.677063	1	1e-06
wgEncodeBroadHistoneH1hescSap3039731Pk.broadPeak	1	broadPeak	wgEncodeBroadHistone	Sap30	3095677412	177152193	0.0572257	376	0.943464	0.056748	0.950674	0.048879	0.001327	0.998644	2247477802	135104642	0.0601139	376	21	355	0.0558511	7993	453	7540	0.0566746	8189	755	7434	0.0921968	1	1e-06	0.811186	0.195141	1	1e-06
wgEncodeBroadHistoneH1hescSirt6Pk.broadPeak	1	broadPeak	wgEncodeBroadHistone	Sirt6	3095677412	1030623420	0.332923	376	0.854462	0.146499	0.161399	0.838963	1.2e-05	0.999984	2247477802	832067715	0.370223	376	131	245	0.348404	7993	2989	5004	0.373952	8189	4412	3777	0.538772	1	1e-06	0.754836	0.208628	1	1e-06
wgEncodeBroadHistoneH1hescSuz12051317Pk.broadPeak	1	broadPeak	wgEncodeBroadHistone	Suz1	3095677412	1031995648	0.333367	376	0.812417	0.188121	0.163386	0.836147	0.000767	0.999315	2247477802	850169284	0.378277	376	142	234	0.37766	7993	3099	4894	0.387714	8189	3741	4448	0.456832	1	1e-06	0.779165	0.22973	1	1e-06
wgEncodeHaibTfbsH1hescAtf2sc81188V0422111PkRep1.broadPeak|wgEncodeHaibTfbsH1hescAtf2sc81188V0422111PkRep2.broadPeak	2	broadPeak	wgEncodeHaibTfbs	Atf2	3095677412	10454504	0.00337713	376	1	0.625406	0.349157	0.650882	0.150147	0.849819	2247477802	6820188	0.0030346	376	1	375	0.00265957	7993	32	7961	0.0040035	8189	54	8135	0.00659421	1	0.606062	1	0.797218	0.789079	0.205823
wgEncodeHaibTfbsH1hescAtf3V0416102PkRep1.broadPeak|wgEncodeHaibTfbsH1hescAtf3V0416102PkRep2.broadPeak	2	broadPeak	wgEncodeHaibTfbs	Atf3	3095677412	1653670	0.000534187	376	1	0.957023	0.191513	0.808772	0.162848	0.837584	2247477802	758511	0.000337494	376	0	376	0	7993	5	7988	0.000625547	8189	2	8187	0.00024423	1	1	1	0.99991	0.783199	0.209694
wgEncodeHaibTfbsH1hescBcl11aV0416102PkRep2.broadPeak	1	broadPeak	wgEncodeHaibTfbs	Bcl11a	3095677412	383739	0.00012396	376	1	0.949144	0.368094	0.633134	0.26405	0.735286	2247477802	310879	0.000138324	376	0	376	0	7993	1	7992	0.000125109	8189	1	8188	0.000122115	1	1	1	0.966632	0.674355	0.331941
wgEncodeHaibTfbsH1hescCreb1sc240V0422111PkRep1.broadPeak|wgEncodeHaibTfbsH1hescCreb1sc240V0422111PkRep2.broadPeak	2	broadPeak	wgEncodeHaibTfbs	Creb1	3095677412	9974662	0.00322213	376	0.162247	0.837003	0.503084	0.497327	0.031428	0.968505	2247477802	4390672	0.0019536	376	1	375	0.00265957	7993	9	7984	0.00112599	8189	32	8157	0.00390768	0.43821	0.631578	0.121885	0.873168	0.988265	0.009618
wgEncodeHaibTfbsH1hescCtcfsc5916V0416102PkRep1.broadPeak|wgEncodeHaibTfbsH1hescCtcfsc5916V0416102PkRep2.broadPeak	2	broadPeak	wgEncodeHaibTfbs	Ctcf	3095677412	21429719	0.00692247	376	0.378402	0.621164	0.099735	0.899719	0.004491	0.995475	2247477802	16033547	0.00713402	376	3	373	0.00797872	7993	60	7933	0.00750657	8189	133	8056	0.0162413	0.744904	0.213482	0.358164	0.647439	1	1e-06
wgEncodeHaibTfbsH1hescE2f6V0422111PkRep1.broadPeak|wgEncodeHaibTfbsH1hescE2f6V0422111PkRep2.broadPeak	2	broadPeak	wgEncodeHaibTfbs	E2f6	3095677412	17457743	0.00563939	376	0.119979	0.879431	0.178888	0.820278	0.005719	0.99436	2247477802	8931225	0.00397389	376	3	373	0.00797872	7993	36	7957	0.00450394	8189	68	8121	0.00830382	0.366673	0.511628	0.099147	0.892859	1	1e-06
wgEncodeHaibTfbsH1hescEgr1V0416102PkRep1.broadPeak|wgEncodeHaibTfbsH1hescEgr1V0416102PkRep2.broadPeak	2	broadPeak	wgEncodeHaibTfbs	Egr1	3095677412	4379865	0.00141483	376	1	0.933415	0.179265	0.821028	0.204953	0.794859	2247477802	1494234	0.000664849	376	0	376	0	7993	8	7985	0.00100088	8189	6	8183	0.00073269	1	0.86154	1	0.963175	0.672366	0.330955
wgEncodeHaibTfbsH1hescFosl1sc183V0416102PkRep1.broadPeak|wgEncodeHaibTfbsH1hescFosl1sc183V0416102PkRep2.broadPeak	2	broadPeak	wgEncodeHaibTfbs	Fosl1	3095677412	644037	0.000208044	376	1	0.99108	1	0.825535	0.109744	0.891191	2247477802	164165	7.30441e-05	376	0	376	0	7993	0	7993	0	8189	1	8188	0.000122115	1	0.999994	1	0.997845	0.906472	0.117305
wgEncodeHaibTfbsH1hescGabpPcr1xPkRep1.broadPeak|wgEncodeHaibTfbsH1hescGabpPcr1xPkRep2.broadPeak	2	broadPeak	wgEncodeHaibTfbs	Gabp	3095677412	8324447	0.00268906	376	1	0.94073	0.024018	0.976185	0.027214	0.972941	2247477802	2458425	0.00109386	376	0	376	0	7993	15	7978	0.00187664	8189	51	8138	0.00622787	1	0.729733	1	0.963862	0.973724	0.019927
wgEncodeHaibTfbsH1hescHdac2sc6296V0416102PkRep1.broadPeak|wgEncodeHaibTfbsH1hescHdac2sc6296V0416102PkRep2.broadPeak	2	broadPeak	wgEncodeHaibTfbs	Hdac2	3095677412	4275097	0.00138099	376	1	0.94143	0.338127	0.662564	0.127589	0.872108	2247477802	2547203	0.00113336	376	0	376	0	7993	9	7984	0.00112599	8189	13	8176	0.0015875	1	1	1	0.969132	0.829086	0.186333
wgEncodeHaibTfbsH1hescJundV0416102PkRep1.broadPeak|wgEncodeHaibTfbsH1hescJundV0416102PkRep2.broadPeak	2	broadPeak	wgEncodeHaibTfbs	Jund	3095677412	5258845	0.00169877	376	1	0.923874	0.2988	0.700136	1	0.326734	2247477802	2003041	0.00089124	376	0	376	0	7993	7	7986	0.000875766	8189	20	8169	0.0024423	1	1	1	0.957276	0.39274	1
wgEncodeHaibTfbsH1hescMaxV0422111PkRep1.broadPeak|wgEncodeHaibTfbsH1hescMaxV0422111PkRep2.broadPeak	2	broadPeak	wgEncodeHaibTfbs	Max	3095677412	25278862	0.00816586	376	0.545101	0.453864	0.23326	0.766419	0.002609	0.997471	2247477802	12140312	0.00540175	376	1	375	0.00265957	7993	44	7949	0.00550482	8189	130	8059	0.015875	0.999998	0.372884	0.406725	0.587537	1	1e-06
wgEncodeHaibTfbsH1hescNanogsc33759V0416102PkRep1.broadPeak|wgEncodeHaibTfbsH1hescNanogsc33759V0416102PkRep2.broadPeak	2	broadPeak	wgEncodeHaibTfbs	Nanog	3095677412	5388281	0.00174058	376	1	0.870298	0.391765	0.607604	0.273637	0.725316	2247477802	3109399	0.00138351	376	0	376	0	7993	12	7981	0.00150131	8189	11	8178	0.00134327	1	0.999998	1	0.936879	0.722968	0.275579
wgEncodeHaibTfbsH1hescNrsfV0416102PkRep1.broadPeak|wgEncodeHaibTfbsH1hescNrsfV0416102PkRep2.broadPeak	2	broadPeak	wgEncodeHaibTfbs	Nrsf	3095677412	6123840	0.00197819	376	0.142364	0.949935	0.222556	0.777593	0.002901	0.997206	2247477802	4054690	0.00180411	376	1	375	0.00265957	7993	19	7974	0.00237708	8189	43	8146	0.00525095	0.471077	0.647893	0.105264	0.918422	1	1e-06
wgEncodeHaibTfbsH1hescP300V0416102PkRep1.broadPeak|wgEncodeHaibTfbsH1hescP300V0416102PkRep2.broadPeak	2	broadPeak	wgEncodeHaibTfbs	P300	3095677412	5554140	0.00179416	376	0.058149	0.941366	0.783919	0.215963	0.406303	0.593729	2247477802	3142965	0.00139844	376	2	374	0.00531915	7993	10	7983	0.00125109	8189	11	8178	0.00134327	0.031249	0.923082	0.02289	0.957512	0.55535	0.418201
wgEncodeHaibTfbsH1hescPol24h8V0416102PkRep1.broadPeak|wgEncodeHaibTfbsH1hescPol24h8V0416102PkRep2.broadPeak	2	broadPeak	wgEncodeHaibTfbs	Pol24h8	3095677412	37278612	0.0120422	376	0.569612	0.431087	0.50478	0.494839	0.000705	0.999239	2247477802	19976407	0.00888837	376	3	373	0.00797872	7993	66	7927	0.00825723	8189	406	7783	0.0495787	1	4e-06	0.384402	0.619815	1	1e-06
wgEncodeHaibTfbsH1hescPol2V0416102PkRep1.broadPeak|wgEncodeHaibTfbsH1hescPol2V0416102PkRep2.broadPeak	2	broadPeak	wgEncodeHaibTfbs	Pol2	3095677412	46181771	0.0149181	376	0.543194	0.456152	0.211488	0.79033	0.002986	0.997188	2247477802	23705864	0.0105478	376	5	371	0.0132979	7993	75	7918	0.00938321	8189	365	7824	0.044572	0.790697	0.303566	0.369842	0.615089	1	1e-06
wgEncodeHaibTfbsH1hescPou5f1sc9081V0416102PkRep1.broadPeak|wgEncodeHaibTfbsH1hescPou5f1sc9081V0416102PkRep2.broadPeak	2	broadPeak	wgEncodeHaibTfbs	Pou5f1	3095677412	1622541	0.000524131	376	1	0.944402	0.467964	0.53213	1	0.461084	2247477802	1361677	0.000605869	376	1	375	0.00265957	7993	1	7992	0.000125109	8189	2	8187	0.00024423	1	1	1	0.983436	0.493778	1
wgEncodeHaibTfbsH1hescRad21V0416102PkRep1.broadPeak|wgEncodeHaibTfbsH1hescRad21V0416102PkRep2.broadPeak	2	broadPeak	wgEncodeHaibTfbs	Rad21	3095677412	41354926	0.0133589	376	0.422903	0.577088	0.040436	0.959324	0.015054	0.985296	2247477802	31017478	0.013801	376	4	372	0.0106383	7993	139	7854	0.0173902	8189	204	7985	0.0249115	0.555556	4e-06	0.386573	0.598622	1	0.001239
wgEncodeHaibTfbsH1hescRxraV0416102PkRep1.broadPeak|wgEncodeHaibTfbsH1hescRxraV0416102PkRep2.broadPeak	2	broadPeak	wgEncodeHaibTfbs	Rxra	3095677412	1065954	0.000344336	376	1	0.980875	0.337822	0.662618	1	0.766007	2247477802	570645	0.000253905	376	0	376	0	7993	3	7990	0.000375328	8189	2	8187	0.00024423	1	1	1	0.992313	0.781331	1
wgEncodeHaibTfbsH1hescSin3ak20Pcr1xPkRep1.broadPeak|wgEncodeHaibTfbsH1hescSin3ak20Pcr1xPkRep2.broadPeak	2	broadPeak	wgEncodeHaibTfbs	Sin3	3095677412	8948494	0.00289064	376	1	0.864494	0.168746	0.831904	0.098391	0.900921	2247477802	3624256	0.00161259	376	0	376	0	7993	9	7984	0.00112599	8189	47	8142	0.00573941	1	0.735849	1	0.922384	0.894719	0.103421
wgEncodeHaibTfbsH1hescSix5Pcr1xPkRep1.broadPeak|wgEncodeHaibTfbsH1hescSix5Pcr1xPkRep2.broadPeak	2	broadPeak	wgEncodeHaibTfbs	Six5	3095677412	1482389	0.000478858	376	1	0.928673	0.345515	0.654181	1	0.368404	2247477802	790914	0.000351912	376	0	376	0	7993	2	7991	0.000250219	8189	4	8185	0.00048846	1	1	1	0.963566	0.429898	1
wgEncodeHaibTfbsH1hescSp1Pcr1xPkRep1.broadPeak|wgEncodeHaibTfbsH1hescSp1Pcr1xPkRep2.broadPeak	2	broadPeak	wgEncodeHaibTfbs	Sp1	3095677412	13866824	0.00447942	376	0.146599	0.853381	0.319016	0.681249	0.147868	0.852034	2247477802	8512910	0.00378776	376	4	372	0.0106383	7993	25	7968	0.00312774	8189	147	8042	0.0179509	4e-06	0.666666	0.145716	0.840235	0.838195	0.145933
wgEncodeHaibTfbsH1hescSp2V0422111PkRep1.broadPeak|wgEncodeHaibTfbsH1hescSp2V0422111PkRep2.broadPeak	2	broadPeak	wgEncodeHaibTfbs	Sp2	3095677412	1301784	0.000420517	376	1	0.959111	0.164932	0.835676	0.226774	0.772995	2247477802	552188	0.000245692	376	0	376	0	7993	2	7991	0.000250219	8189	5	8184	0.000610575	1	1	1	0.986051	0.774281	0.238227
wgEncodeHaibTfbsH1hescSp4v20V0422111PkRep1.broadPeak|wgEncodeHaibTfbsH1hescSp4v20V0422111PkRep2.broadPeak	2	broadPeak	wgEncodeHaibTfbs	Sp4	3095677412	8624332	0.00278593	376	1	0.841615	0.24567	0.753439	0.078868	0.921277	2247477802	3688306	0.00164109	376	0	376	0	7993	16	7977	0.00200175	8189	37	8152	0.00451826	1	0.800001	1	0.923628	0.87366	0.113174
wgEncodeHaibTfbsH1hescSrfPcr1xPkRep1.broadPeak|wgEncodeHaibTfbsH1hescSrfPcr1xPkRep2.broadPeak	2	broadPeak	wgEncodeHaibTfbs	Srf	3095677412	1914441	0.000618424	376	1	0.918832	1	0.163997	1	0.311599	2247477802	1167133	0.000519308	376	0	376	0	7993	3	7990	0.000375328	8189	0	8189	0	1	1	1	0.948336	0.394152	1
wgEncodeHaibTfbsH1hescTaf1V0416102PkRep1.broadPeak|wgEncodeHaibTfbsH1hescTaf1V0416102PkRep2.broadPeak	2	broadPeak	wgEncodeHaibTfbs	Taf1	3095677412	18157603	0.00586547	376	0.413822	0.585959	0.935135	0.065242	0.02754	0.972104	2247477802	6980383	0.00310587	376	2	374	0.00531915	7993	22	7971	0.00275241	8189	62	8127	0.00757113	0.64705	0.333336	0.238481	0.770381	0.997958	0.002209
wgEncodeHaibTfbsH1hescTaf7sc101167V0416102PkRep1.broadPeak|wgEncodeHaibTfbsH1hescTaf7sc101167V0416102PkRep2.broadPeak	2	broadPeak	wgEncodeHaibTfbs	Taf7	3095677412	8670035	0.00280069	376	1	0.889168	0.818815	0.181267	0.308334	0.691911	2247477802	3633397	0.00161666	376	0	376	0	7993	11	7982	0.0013762	8189	29	8160	0.00354134	1	0.823535	1	0.933146	0.538315	0.498618
wgEncodeHaibTfbsH1hescTcf12Pcr1xPkRep1.broadPeak|wgEncodeHaibTfbsH1hescTcf12Pcr1xPkRep2.broadPeak	2	broadPeak	wgEncodeHaibTfbs	Tcf12	3095677412	8657899	0.00279677	376	0.138209	0.861984	0.841694	0.157794	0.336241	0.663598	2247477802	5377917	0.00239287	376	2	374	0.00531915	7993	21	7972	0.0026273	8189	27	8162	0.00329711	0.222221	0.611134	0.147235	0.868878	0.550599	0.397429
wgEncodeHaibTfbsH1hescTead4sc101184V0422111PkRep1.broadPeak|wgEncodeHaibTfbsH1hescTead4sc101184V0422111PkRep2.broadPeak	2	broadPeak	wgEncodeHaibTfbs	Tead4	3095677412	17680689	0.00571141	376	0.519006	0.482231	0.795434	0.205308	0.154326	0.845925	2247477802	11799524	0.00525012	376	1	375	0.00265957	7993	46	7947	0.00575504	8189	62	8127	0.00757113	1e-05	0.472217	0.374465	0.610155	0.831594	0.18385
wgEncodeHaibTfbsH1hescUsf1Pcr1xPkRep1.broadPeak|wgEncodeHaibTfbsH1hescUsf1Pcr1xPkRep2.broadPeak	2	broadPeak	wgEncodeHaibTfbs	Usf1	3095677412	11534419	0.00372598	376	1	0.466834	0.129512	0.871467	0.428946	0.571709	2247477802	8469685	0.00376853	376	0	376	0	7993	33	7960	0.00412861	8189	30	8159	0.00366345	1	0.500002	1	0.668353	0.466098	0.50692
wgEncodeHaibTfbsH1hescYy1sc281V0416102PkRep1.broadPeak|wgEncodeHaibTfbsH1hescYy1sc281V0416102PkRep2.broadPeak	2	broadPeak	wgEncodeHaibTfbs	Yy1	3095677412	18666763	0.00602994	376	1	0.483016	0.881832	0.118377	0.115118	0.884908	2247477802	10736736	0.00477724	376	2	374	0.00531915	7993	35	7958	0.00437883	8189	61	8128	0.00744902	1	0.64706	1	0.686843	0.923063	0.05003
wgEncodeOpenChromChipH1hescCmycPk.narrowPeak	1	narrowPeak	wgEncodeOpenChromChip	ChIP cMyc	3095677412	1916864	0.000619207	376	1	0.823511	0.23455	0.766205	0.005786	0.99426	2247477802	1164975	0.000518348	376	0	376	0	7993	3	7990	0.000375328	8189	19	8170	0.00232019	1	0.637937	1	0.902022	0.995028	0.002032
wgEncodeOpenChromChipH1hescCtcfPk.narrowPeak	1	narrowPeak	wgEncodeOpenChromChip	ChIP Ctcf	3095677412	11922946	0.00385148	376	0.157412	0.842385	0.14004	0.859257	0.002309	0.997687	2247477802	7177468	0.00319357	376	3	373	0.00797872	7993	33	7960	0.00412861	8189	80	8109	0.0097692	0.574465	0.456138	0.209927	0.809093	1	1e-06
wgEncodeOpenChromChipH1hescPol2Pk.narrowPeak	1	narrowPeak	wgEncodeOpenChromChip	ChIP Pol2	3095677412	37799659	0.0122105	376	0.264059	0.735748	0.448753	0.551335	0.001419	0.998546	2247477802	21077454	0.00937827	376	6	370	0.0159574	7993	68	7925	0.00850744	8189	392	7797	0.0478691	0.900002	0.020408	0.248753	0.763647	1	1e-06
wgEncodeOpenChromDnaseH1hescPk.narrowPeak	1	narrowPeak	wgEncodeOpenChromDnase	DNAseH1 HS	3095677412	87294396	0.0281988	376	0.355852	0.644605	0.775294	0.224676	0.000686	0.999307	2247477802	41674656	0.0185429	376	4	372	0.0106383	7993	153	7840	0.0191417	8189	550	7639	0.0671633	0.984845	1e-06	0.311328	0.694569	1	1e-06
wgEncodeOpenChromFaireH1hescPk.narrowPeak	1	narrowPeak	wgEncodeOpenChromFaire	FAIRE	3095677412	15874460	0.00512794	376	0.449969	0.551933	0.433202	0.56714	0.044451	0.95552	2247477802	12351811	0.00549585	376	2	374	0.00531915	7993	45	7948	0.00562993	8189	67	8122	0.00818171	0.454543	0.611105	0.413496	0.555723	0.977009	0.013698
wgEncodeOpenChromSynthH1hescPk.bed	1	bed	wgEncodeOpenChromSynth	Synth	3095677412	103159342	0.0333237	376	0.790841	0.328337	0.490595	0.537515	1e-06	1	2247477802	53517676	0.0238123	376	7	369	0.018617	7993	191	7802	0.0238959	8189	667	7522	0.0814507	1	1e-06	0.652068	0.350335	1	1e-06
wgEncodeSunyAlbanyGeneStH1hescElavl1RbpAssocRnaV2.broadPeak	1	broadPeak	wgEncodeSunyAlbanyGeneSt	Elavl1 RBP Assoc RNA V2	3095677412	158374542	0.0511599	376	0.98687	0.013393	0.991784	0.008146	0.003111	0.996928	2247477802	128105823	0.0569998	376	13	363	0.0345745	7993	415	7578	0.0519204	8189	1127	7062	0.137624	1	1e-06	0.896976	0.10874	1	1e-06
wgEncodeSunyAlbanyGeneStH1hescRipinputRbpAssocRnaV2.broadPeak	1	broadPeak	wgEncodeSunyAlbanyGeneSt	RIP input V2	3095677412	1029030974	0.332409	376	0.996218	0.00369	0.999997	3e-06	1e-06	1	2247477802	818040891	0.363982	376	109	267	0.289894	7993	2714	5279	0.339547	8189	7310	879	0.892661	1	1e-06	0.871636	0.116661	1	1e-06
wgEncodeSunyAlbanyGeneStH1hescT7tagRbpAssocRnaV2.broadPeak	1	broadPeak	wgEncodeSunyAlbanyGeneSt	T7tag RBP Assoc RNA V2	3095677412	6592575	0.00212961	376	0.040663	0.959399	0.722803	0.27726	0.098901	0.902093	2247477802	4861086	0.00216291	376	3	373	0.00797872	7993	15	7978	0.00187664	8189	33	8156	0.0040298	0.120689	0.680004	0.053569	0.94146	0.999998	1e-06
wgEncodeSydhTfbsH1hescBach1sc14700IggrabPk.narrowPeak	1	narrowPeak	wgEncodeSydhTfbs	Bach1	3095677412	15591249	0.00503646	376	0.672327	0.326821	0.605578	0.394995	0.298995	0.700345	2247477802	8203008	0.00364987	376	1	375	0.00265957	7993	24	7969	0.00300263	8189	36	8153	0.00439614	0.625	0.421571	0.443237	0.513273	0.703782	0.263318
wgEncodeSydhTfbsH1hescBrca1IggrabPk.narrowPeak	1	narrowPeak	wgEncodeSydhTfbs	Brca1	3095677412	4055812	0.00131015	376	0.241295	0.758116	0.157384	0.841691	0.312273	0.689244	2247477802	2193921	0.00097617	376	1	375	0.00265957	7993	9	7984	0.00112599	8189	13	8176	0.0015875	0.153852	0.400016	0.173919	0.816532	0.749782	0.344033
wgEncodeSydhTfbsH1hescCebpbIggrabPk.narrowPeak	1	narrowPeak	wgEncodeSydhTfbs	Cebpb	3095677412	16832501	0.00543742	376	0.009789	0.990165	0.127543	0.872796	0.941503	0.058945	2247477802	13177748	0.00586335	376	5	371	0.0132979	7993	51	7942	0.00638058	8189	33	8156	0.0040298	1e-06	0.963636	0.033328	0.960838	0.00022	0.936827
wgEncodeSydhTfbsH1hescChd1a301218aIggrabPk.narrowPeak	1	narrowPeak	wgEncodeSydhTfbs	Chd1	3095677412	8901760	0.00287555	376	0.435692	0.56587	0.752505	0.247713	0.219591	0.780846	2247477802	5278559	0.00234866	376	1	375	0.00265957	7993	15	7978	0.00187664	8189	27	8162	0.00329711	0.418588	0.61017	0.312933	0.680793	0.88794	0.099864
wgEncodeSydhTfbsH1hescChd2IggrabPk.narrowPeak	1	narrowPeak	wgEncodeSydhTfbs	Chd2	3095677412	14856878	0.00479923	376	0.043723	0.956145	0.682786	0.317287	0.009282	0.990743	2247477802	7585413	0.00337508	376	3	373	0.00797872	7993	25	7968	0.00312774	8189	68	8121	0.00830382	0.306131	0.775865	0.072512	0.937429	0.999642	0.000327
wgEncodeSydhTfbsH1hescCjunIggrabPk.narrowPeak	1	narrowPeak	wgEncodeSydhTfbs	Cjun	3095677412	4428428	0.00143052	376	0.003472	0.996589	0.633402	0.365818	0.838652	0.161935	2247477802	3266292	0.00145331	376	1	375	0.00265957	7993	12	7981	0.00150131	8189	6	8183	0.00073269	1e-06	1	0.013279	0.992154	0.202039	0.799143
wgEncodeSydhTfbsH1hescCmycIggrabPk.narrowPeak	1	narrowPeak	wgEncodeSydhTfbs	Cmyc	3095677412	11063319	0.0035738	376	0.36337	0.636541	0.75161	0.248344	0.050623	0.948855	2247477802	5798934	0.0025802	376	2	374	0.00531915	7993	20	7973	0.00250219	8189	35	8154	0.00427403	0.500005	0.420002	0.335054	0.687825	0.978809	0.02333
wgEncodeSydhTfbsH1hescCtbp2UcdPk.narrowPeak	1	narrowPeak	wgEncodeSydhTfbs	Ctbp2	3095677412	13387977	0.00432473	376	1	0.36898	0.267948	0.730786	0.013442	0.986153	2247477802	5977941	0.00265984	376	0	376	0	7993	26	7967	0.00325285	8189	55	8134	0.00671633	1	0.289474	1	0.649601	1	1e-06
wgEncodeSydhTfbsH1hescGtf2f1IggrabPk.narrowPeak	1	narrowPeak	wgEncodeSydhTfbs	Gtf2f1	3095677412	12949881	0.00418321	376	0.606586	0.393834	0.072247	0.927846	0.018092	0.981872	2247477802	7408272	0.00329626	376	1	375	0.00265957	7993	35	7958	0.00437883	8189	50	8139	0.00610575	0.68333	0.27027	0.43494	0.544182	0.984779	0.017919
wgEncodeSydhTfbsH1hescJundIggrabPk.narrowPeak	1	narrowPeak	wgEncodeSydhTfbs	Jund	3095677412	20494970	0.00662051	376	0.133975	0.867018	0.205491	0.794316	0.054697	0.945461	2247477802	13515328	0.00601355	376	4	372	0.0106383	7993	56	7937	0.00700613	8189	73	8116	0.0089144	0.251855	0.628575	0.181301	0.834878	0.94937	0.018879
wgEncodeSydhTfbsH1hescMafkIggrabPk.narrowPeak	1	narrowPeak	wgEncodeSydhTfbs	Mafk	3095677412	10477076	0.00338442	376	1	0.212419	0.650092	0.350825	0.962275	0.03764	2247477802	9251883	0.00411656	376	0	376	0	7993	30	7963	0.00375328	8189	21	8168	0.00256442	1	0.812498	1	0.484606	0.043347	0.959086
wgEncodeSydhTfbsH1hescMaxUcdPk.narrowPeak	1	narrowPeak	wgEncodeSydhTfbs	Max	3095677412	17936928	0.00579419	376	0.183389	0.816492	0.250052	0.749259	0.088252	0.912265	2247477802	13015248	0.00579105	376	3	373	0.00797872	7993	41	7952	0.00512949	8189	68	8121	0.00830382	0.312499	0.64583	0.205608	0.7932	0.920065	0.046397
wgEncodeSydhTfbsH1hescMxi1IggrabPk.narrowPeak	1	narrowPeak	wgEncodeSydhTfbs	Mxi1	3095677412	12171514	0.00393178	376	0.523963	0.475969	0.498359	0.50144	0.002391	0.997579	2247477802	5777263	0.00257055	376	1	375	0.00265957	7993	18	7975	0.00225197	8189	76	8113	0.00928074	0.942528	0.125004	0.356605	0.615041	0.99932	1e-06
wgEncodeSydhTfbsH1hescNrf1IggrabPk.narrowPeak	1	narrowPeak	wgEncodeSydhTfbs	Nrf1	3095677412	3256398	0.00105192	376	1	0.802118	0.165893	0.833555	0.093634	0.906138	2247477802	1320059	0.000587351	376	0	376	0	7993	8	7985	0.00100088	8189	8	8181	0.00097692	1	0.897437	1	0.876124	0.895982	0.098636
wgEncodeSydhTfbsH1hescRad21IggrabPk.narrowPeak	1	narrowPeak	wgEncodeSydhTfbs	Rad21	3095677412	29895094	0.00965704	376	0.447052	0.553247	0.261652	0.738361	0.003425	0.996725	2247477802	22598804	0.0100552	376	3	373	0.00797872	7993	91	7902	0.011385	8189	151	8038	0.0184394	0.798246	0.245901	0.418725	0.579748	1	1e-06
wgEncodeSydhTfbsH1hescRfx5200401194IggrabPk.narrowPeak	1	narrowPeak	wgEncodeSydhTfbs	Rfx5	3095677412	2334722	0.000754188	376	0.029547	0.970405	0.768534	0.232225	0.25519	0.744201	2247477802	1435318	0.000638635	376	1	375	0.00265957	7993	5	7988	0.000625547	8189	10	8179	0.00122115	3e-06	0.906254	0.04003	0.953629	0.609134	0.352723
wgEncodeSydhTfbsH1hescSin3anb6001263IggrabPk.narrowPeak	1	narrowPeak	wgEncodeSydhTfbs	Sin3	3095677412	32843088	0.0106093	376	0.852402	0.147209	0.969454	0.030747	0.001473	0.998521	2247477802	17089507	0.00760386	376	1	375	0.00265957	7993	44	7949	0.00550482	8189	176	8013	0.0214922	0.983051	0.025641	0.681396	0.320674	1	1e-06
wgEncodeSydhTfbsH1hescSuz12UcdPk.narrowPeak	1	narrowPeak	wgEncodeSydhTfbs	Suz12	3095677412	5476361	0.00176903	376	1	0.571557	0.255259	0.744667	0.002547	0.997519	2247477802	3360533	0.00149525	376	0	376	0	7993	12	7981	0.00150131	8189	51	8138	0.00622787	1	0.309524	1	0.766636	1	1e-06
wgEncodeSydhTfbsH1hescTbpIggrabPk.narrowPeak	1	narrowPeak	wgEncodeSydhTfbs	Tbp	3095677412	18316520	0.00591681	376	0.533108	0.466707	0.667968	0.331635	0.017594	0.982515	2247477802	8087446	0.00359845	376	2	374	0.00531915	7993	23	7970	0.00287752	8189	64	8125	0.00781536	0.637932	0.151519	0.416846	0.58884	0.997306	0.00066
wgEncodeSydhTfbsH1hescUsf2IggrabPk.narrowPeak	1	narrowPeak	wgEncodeSydhTfbs	Usf2	3095677412	8091043	0.00261366	376	1	0.47753	0.49859	0.501334	0.068479	0.930673	2247477802	4409594	0.00196202	376	0	376	0	7993	18	7975	0.00225197	8189	29	8160	0.00354134	1	0.411757	1	0.68254	0.958999	0.044401
wgEncodeSydhTfbsH1hescZnf143IggrabPk.narrowPeak	1	narrowPeak	wgEncodeSydhTfbs	Znf143	3095677412	27652801	0.00893271	376	0.71677	0.283271	0.026535	0.97358	0.008487	0.991608	2247477802	17735460	0.00789127	376	2	374	0.00531915	7993	71	7922	0.00888277	8189	126	8063	0.0153865	0.869567	1e-06	0.622201	0.391317	0.998924	0.002855
wgEncodeSydhTfbsH1hescZnf274m01UcdPk.narrowPeak	1	narrowPeak	wgEncodeSydhTfbs	Znf274m0	3095677412	1293387	0.000417804	376	0.966958	0.88637	0.784746	0.21514	0.756253	0.395742	2247477802	950363	0.000422858	376	0	376	0	7993	5	7988	0.000625547	8189	0	8189	0	1	1	0.995588	0.925958	0.364529	0.807816
wgEncodeUwDgfH7esHotspots.broadPeak	1	broadPeak	wgEncodeUwDgf	Digital DNAse Genomic Footprinting-Hotspots*	3095677412	236940779	0.0765392	376	0.815956	0.184704	0.645709	0.355443	0.005097	0.994674	2247477802	195398461	0.0869412	376	22	354	0.0585106	7993	684	7309	0.0855749	8189	903	7286	0.11027	0.999997	0.033901	0.704136	0.310453	1	1e-06
wgEncodeUwDgfH7esPkV2.narrowPeak	1	narrowPeak	wgEncodeUwDgf	Digital DNAse Genomic Footprinting*	3095677412	66313950	0.0214215	376	0.440577	0.559298	0.161756	0.839187	0.130496	0.869241	2247477802	55965609	0.0249015	376	6	370	0.0159574	7993	212	7781	0.0265232	8189	271	7918	0.0330932	0.666666	0.493339	0.37811	0.609213	0.85889	0.121404
wgEncodeUwDnaseH1hescHotspotsRep1.broadPeak	1	broadPeak	wgEncodeUwDnase	DNAse-Hotspots	3095677412	100995227	0.0326246	376	0.533064	0.467129	0.139849	0.860338	0.002452	0.997508	2247477802	71135735	0.0316514	376	11	365	0.0292553	7993	278	7715	0.0347804	8189	727	7462	0.0887776	0.666691	0.227268	0.449828	0.549477	1	1e-06
wgEncodeUwDnaseH1hescPkRep1.narrowPeak	1	narrowPeak	wgEncodeUwDnase	DNAse	3095677412	22644990	0.00731504	376	0.107016	0.894594	0.525716	0.47524	0.027467	0.972792	2247477802	15316056	0.00681478	376	4	372	0.0106383	7993	60	7933	0.00750657	8189	96	8093	0.011723	0.42856	0.785704	0.140103	0.854992	0.974241	0.019586
wgEncodeUwHistoneH7esH3k04me3StdHotspotsRep1.broadPeak|wgEncodeUwHistoneH7esH3k04me3StdHotspotsRep2.broadPeak	2	broadPeak	wgEncodeUwHistone	H3k4me3-Hotspots*	3095677412	59870308	0.01934	376	0.749611	0.251128	0.982872	0.017231	0.004032	0.995982	2247477802	41234216	0.0183469	376	4	372	0.0106383	7993	104	7889	0.0130114	8189	337	7852	0.0411528	0.977012	1e-06	0.566936	0.425065	1	1e-06
wgEncodeUwHistoneH7esH3k04me3StdPkRep1.narrowPeak|wgEncodeUwHistoneH7esH3k04me3StdPkRep2.narrowPeak	2	narrowPeak	wgEncodeUwHistone	H3k4me3*	3095677412	16695060	0.00539302	376	1	0.586809	0.924525	0.075445	0.039667	0.960347	2247477802	9682945	0.00430836	376	0	376	0	7993	19	7974	0.00237708	8189	102	8087	0.0124557	1	0.5	1	0.798347	0.99622	0.009365
wgEncodeUwHistoneH7esH3k27me3StdHotspotsRep1.broadPeak|wgEncodeUwHistoneH7esH3k27me3StdHotspotsRep2.broadPeak	2	broadPeak	wgEncodeUwHistone	H3k27me3-Hotspots*	3095677412	95347678	0.0308003	376	0.849639	0.149514	0.950983	0.049767	0.001812	0.998131	2247477802	80306561	0.0357319	376	9	367	0.0239362	7993	302	7691	0.0377831	8189	531	7658	0.0648431	1	0.062498	0.595406	0.348685	1	1e-06
wgEncodeUwHistoneH7esH3k27me3StdPkRep1.narrowPeak|wgEncodeUwHistoneH7esH3k27me3StdPkRep2.narrowPeak	2	narrowPeak	wgEncodeUwHistone	H3k27me3*	3095677412	19040440	0.00615065	376	1	0.733555	0.880278	0.121183	0.005079	0.994897	2247477802	15224998	0.00677426	376	1	375	0.00265957	7993	53	7940	0.0066308	8189	154	8035	0.0188057	1	0.654551	1	0.8716	1	1e-06
wgEncodeUwHistoneH7esH3k36me3StdHotspotsRep1.broadPeak|wgEncodeUwHistoneH7esH3k36me3StdHotspotsRep2.broadPeak	2	broadPeak	wgEncodeUwHistone	H3k36me3-Hotspots*	3095677412	150641850	0.048662	376	0.269992	0.729102	0.991158	0.008675	1e-06	1	2247477802	134234207	0.0597266	376	21	355	0.0558511	7993	407	7586	0.0509196	8189	2759	5430	0.336915	1	1e-06	0.226022	0.800718	1	1e-06
wgEncodeUwHistoneH7esH3k36me3StdPkRep1.narrowPeak|wgEncodeUwHistoneH7esH3k36me3StdPkRep2.narrowPeak	2	narrowPeak	wgEncodeUwHistone	H3k36me3*	3095677412	22171270	0.00716201	376	1	0.631288	0.88422	0.117354	2e-05	0.999975	2247477802	20195988	0.00898607	376	4	372	0.0106383	7993	53	7940	0.0066308	8189	778	7411	0.0950055	1	0.077922	1	0.82515	1	1e-06
wgEncodeUwHistoneH7esH3k4me3StdHotspotsRep1.broadPeak|wgEncodeUwHistoneH7esH3k4me3StdHotspotsRep2.broadPeak	2	broadPeak	wgEncodeUwHistone	H3k4me3-Hotspots*	3095677412	51806882	0.0167352	376	0.529942	0.470922	0.986507	0.013342	0.005478	0.994501	2247477802	29733103	0.0132295	376	3	373	0.00797872	7993	83	7910	0.0103841	8189	281	7908	0.0343143	0.94203	0.030303	0.434293	0.558353	1	1e-06
wgEncodeUwHistoneH7esH3k4me3StdPkRep1.narrowPeak|wgEncodeUwHistoneH7esH3k4me3StdPkRep2.narrowPeak	2	narrowPeak	wgEncodeUwHistone	H3k4me3*	3095677412	14820130	0.00478736	376	1	0.766894	0.410778	0.589104	0.013606	0.986166	2247477802	6904450	0.00307209	376	0	376	0	7993	13	7980	0.00162642	8189	82	8107	0.0100134	1	0.758624	1	0.892494	0.996612	0.008256
Human Lymphoblastoid Cell line (Gm12878)
Encode tracks	replicates	Encode_file_type	Encode_experiment	Encode_test_factor	genome_length_all	genome_covered_all	genome_coverage_all	snps_tested	som_mut_pvalues_enrichment	som_mut_pvalues_depletion	dbSNP_pvalues_enrichment	dbSNP_pvalues_depletion	ClinVar_pvalues_enrichment	dbSNP_pvalues_depletion	genome_length_tested	genome_covered_tested	genome_coverage_tested	som_mut_tested	som_mut_covered	som_mut_uncovered	som_mut_coverage	dbSNP_tested	dbSNP_covered	dbSNP_uncovered	dbSNP_coverage	ClinVar_tested	ClinVar_covered	ClinVar_uncovered	ClinVar_coverage	p_values_enrichment_(som_mut_vs_ClinVar)	p_values_depletion_(som_mut_vs_ClinVar)	p_values_enrichment_(som_mut_vs_dbSNP)	p_values_depletion_(som_mut_vs_dbSNP)	p_values_enrichment_(dbSNP_vs_ClinVar)	p_values_depletion_dbSNP_vs_ClinVar)
wgEncodeHaibMethylWgbsGm12878CpGSites.bed	1	bed	HaibMethylWgbs	CpG Sites	3095677412	51360715	0.0165911	376	1e-06	1	1e-06	1	1e-06	1	2247477802	32138498	0.0142998	376	63	313	0.167553	7996	1108	6888	0.138569	8189	2433	5756	0.297106	1	1e-06	0.173774	0.840505	1	1e-06
wgEncodeHaibMethylWgbsGm12878NonCpGSites.bed	1	bed	HaibMethylWgbs	NonCpG Sites	3095677412	1039636139	0.335835	376	0.72134	0.288745	0.21059	0.790521	0.570544	0.432583	2247477802	838278882	0.372987	376	169	207	0.449468	7996	3081	4915	0.385318	8189	3202	4987	0.391012	0.568628	0.307699	0.558308	0.439861	0.482459	0.515841
wgEncodeBroadHistoneGm12878CtcfStdPk.broadPeak	1	broadPeak	wgEncodeBroadHistone	Ctcf	3095677412	174671713	0.0564244	376	0.507855	0.49202	0.971048	0.028665	0.000535	0.999459	2247477802	141608412	0.0630077	376	28	348	0.0744681	7989	473	7516	0.0592064	8189	958	7231	0.116986	1	0.057147	0.468742	0.35766	1	1e-06
wgEncodeBroadHistoneGm12878Ezh239875Pk.broadPeak	1	broadPeak	wgEncodeBroadHistone	Ezh2	3095677412	986829937	0.318777	376	0.970293	0.02999	0.996972	0.002983	0.002205	0.997742	2247477802	848370223	0.377477	376	127	249	0.337766	7989	2855	5134	0.357366	8189	3914	4275	0.477958	1	1e-06	0.777612	0.235675	0.994582	0.010942
wgEncodeBroadHistoneGm12878H2azStdPk.broadPeak	1	broadPeak	wgEncodeBroadHistone	H2az	3095677412	264058975	0.0852993	376	0.527677	0.471747	0.734574	0.265701	0.061867	0.938028	2247477802	218908296	0.0974018	376	36	340	0.0957447	7989	790	7199	0.098886	8189	953	7236	0.116376	0.75001	0.333336	0.400839	0.602742	0.994462	0.002557
wgEncodeBroadHistoneGm12878H3k04me1StdPkV2.broadPeak	1	broadPeak	wgEncodeBroadHistone	H3k4me1	3095677412	337147496	0.108909	376	0.540246	0.460002	0.999237	0.000748	0.003076	0.996931	2247477802	279058844	0.124165	376	41	335	0.109043	7989	893	7096	0.111779	8189	1520	6669	0.185615	1	1e-06	0.40987	0.604496	1	1e-06
wgEncodeBroadHistoneGm12878H3k04me3StdPkV2.broadPeak	1	broadPeak	wgEncodeBroadHistone	H3k4me3	3095677412	228173146	0.073707	376	0.525516	0.474896	0.992265	0.00794	0.000418	0.99955	2247477802	183555696	0.0816719	376	31	345	0.0824468	7989	601	7388	0.0752284	8189	1029	7160	0.125656	1	0.021279	0.326281	0.692724	1	1e-06
wgEncodeBroadHistoneGm12878H3k27acStdPk.broadPeak	1	broadPeak	wgEncodeBroadHistone	H3k27ac	3095677412	150138413	0.0484994	376	0.783107	0.216558	0.923526	0.076238	0.054554	0.945373	2247477802	119371727	0.0531136	376	13	363	0.0345745	7989	386	7603	0.0483164	8189	619	7570	0.0755892	0.928566	0.062502	0.597426	0.401786	0.994507	0.006048
wgEncodeBroadHistoneGm12878H3k27me3StdPkV2.broadPeak	1	broadPeak	wgEncodeBroadHistone	H3k27me3	3095677412	991502541	0.320286	376	0.961384	0.038873	0.004445	0.995562	0.024104	0.975485	2247477802	843030358	0.375101	376	124	252	0.329787	7989	3180	4809	0.398047	8189	3465	4724	0.423129	1	0.026665	0.944066	0.04989	0.990403	0.016868
wgEncodeBroadHistoneGm12878H3k36me3StdPk.broadPeak	1	broadPeak	wgEncodeBroadHistone	H3k36me3	3095677412	552701851	0.17854	376	0.999983	1.4e-05	0.999982	1.6e-05	4.9e-05	0.999957	2247477802	441997988	0.196664	376	42	334	0.111702	7989	1372	6617	0.171736	8189	3555	4634	0.434119	1	1e-06	0.975217	0.02705	1	1e-06
wgEncodeBroadHistoneGm12878H3k4me2StdPk.broadPeak	1	broadPeak	wgEncodeBroadHistone	H3k4me2	3095677412	191505878	0.0618623	376	0.217834	0.782155	0.992385	0.007735	0.000309	0.999695	2247477802	150865149	0.0671264	376	26	350	0.0691489	7989	491	7498	0.0614595	8189	927	7262	0.113201	0.97561	0.090909	0.076458	0.844669	1	1e-06
wgEncodeBroadHistoneGm12878H3k79me2StdPk.broadPeak	1	broadPeak	wgEncodeBroadHistone	H3k79me2	3095677412	278795653	0.0900597	376	0.954304	0.045506	0.999526	0.000477	0.00028	0.999724	2247477802	223165322	0.0992959	376	24	352	0.0638298	7989	677	7312	0.0847415	8189	1196	6993	0.14605	1	1e-06	0.678759	0.307998	1	1e-06
wgEncodeBroadHistoneGm12878H3k9acStdPk.broadPeak	1	broadPeak	wgEncodeBroadHistone	H3k9ac	3095677412	121396252	0.0392148	376	0.592155	0.407904	0.922423	0.07721	0.003137	0.996696	2247477802	93079823	0.0414152	376	12	364	0.0319149	7989	313	7676	0.0391789	8189	554	7635	0.0676517	0.980392	0.013157	0.433784	0.563111	1	1e-06
wgEncodeBroadHistoneGm12878H3k9me3StdPk.broadPeak	1	broadPeak	wgEncodeBroadHistone	H3k9me3	3095677412	523365403	0.169063	376	0.912432	0.087013	0.263617	0.737387	0.999992	5e-06	2247477802	439279292	0.195454	376	67	309	0.178191	7989	1581	6408	0.197897	8189	1000	7189	0.122115	0.266665	0.833328	0.880885	0.123732	1e-06	1
wgEncodeBroadHistoneGm12878H4k20me1StdPk.broadPeak	1	broadPeak	wgEncodeBroadHistone	H4k20me1	3095677412	714243480	0.230723	376	0.919583	0.080145	0.461145	0.538987	0.000277	0.999755	2247477802	581164660	0.258585	376	90	286	0.239362	7989	2071	5918	0.259231	8189	3513	4676	0.42899	1	1e-06	0.774495	0.232518	1	1e-06
wgEncodeHaibTfbsGm12878Atf2sc81188V0422111PkRep1.broadPeak|wgEncodeHaibTfbsGm12878Atf2sc81188V0422111PkRep2.broadPeak	2	broadPeak	wgEncodeHaibTfbs	Atf2	3095677412	26034563	0.00840997	376	0.13955	0.860368	0.198745	0.800243	0.67958	0.320066	2247477802	20364094	0.00906087	376	6	370	0.0159574	7989	77	7912	0.00963825	8189	66	8123	0.00805959	0.09375	0.907692	0.169227	0.821364	0.192868	0.793732
wgEncodeHaibTfbsGm12878Atf3Pcr1xPkRep1.broadPeak|wgEncodeHaibTfbsGm12878Atf3Pcr1xPkRep2.broadPeak	2	broadPeak	wgEncodeHaibTfbs	Atf3	3095677412	1257060	0.000406069	376	1	0.981499	0.290286	0.710521	1	0.760513	2247477802	560683	0.000249472	376	0	376	0	7989	1	7988	0.000125172	8189	1	8188	0.000122115	1	1	1	0.983321	0.762951	1
wgEncodeHaibTfbsGm12878BatfPcr1xPkRep1.broadPeak|wgEncodeHaibTfbsGm12878BatfPcr1xPkRep2.broadPeak	2	broadPeak	wgEncodeHaibTfbs	Batf	3095677412	21010673	0.0067871	376	0.074108	0.925957	0.688809	0.311068	0.775049	0.224731	2247477802	14976994	0.00666391	376	5	371	0.0132979	7989	52	7937	0.00650895	8189	30	8159	0.00366345	1e-06	0.853447	0.108248	0.890334	0.205304	0.816764
wgEncodeHaibTfbsGm12878Bcl11aPcr1xPkRep1.broadPeak|wgEncodeHaibTfbsGm12878Bcl11aPcr1xPkRep2.broadPeak	2	broadPeak	wgEncodeHaibTfbs	Bcl11a	3095677412	14100340	0.00455485	376	0.296834	0.702342	0.781266	0.218277	0.720751	0.279357	2247477802	8407579	0.0037409	376	2	374	0.00531915	7989	31	7958	0.00388034	8189	18	8171	0.00219807	0.2066	0.84211	0.214093	0.770898	0.211259	0.782346
wgEncodeHaibTfbsGm12878Bcl3V0416101PkRep1.broadPeak|wgEncodeHaibTfbsGm12878Bcl3V0416101PkRep2.broadPeak	2	broadPeak	wgEncodeHaibTfbs	Bcl3	3095677412	11780043	0.00380532	376	1	0.689918	0.492932	0.507191	0.43016	0.568247	2247477802	8901249	0.00396055	376	2	374	0.00531915	7989	36	7953	0.0045062	8189	29	8160	0.00354134	1	1	1	0.803427	0.322685	0.617548
wgEncodeHaibTfbsGm12878Bclaf101388V0416101PkRep1.broadPeak|wgEncodeHaibTfbsGm12878Bclaf101388V0416101PkRep2.broadPeak	2	broadPeak	wgEncodeHaibTfbs	Bclaf	3095677412	23563834	0.00761185	376	0.110162	0.889933	0.05791	0.942022	0.359536	0.642278	2247477802	16636569	0.00740233	376	5	371	0.0132979	7989	55	7934	0.00688447	8189	77	8112	0.00940286	0.155737	0.941176	0.140675	0.861035	0.454992	0.542256
wgEncodeHaibTfbsGm12878Cebpbsc150V0422111PkRep1.broadPeak|wgEncodeHaibTfbsGm12878Cebpbsc150V0422111PkRep2.broadPeak	2	broadPeak	wgEncodeHaibTfbs	Cebpb	3095677412	10837478	0.00350084	376	1	0.874689	0.833369	0.166819	0.290858	0.709393	2247477802	8291899	0.00368942	376	1	375	0.00265957	7989	29	7960	0.00362999	8189	24	8165	0.00293076	1	0.914286	1	0.939025	0.580456	0.43622
wgEncodeHaibTfbsGm12878Creb1sc240V0422111PkRep1.broadPeak|wgEncodeHaibTfbsGm12878Creb1sc240V0422111PkRep2.broadPeak	2	broadPeak	wgEncodeHaibTfbs	Creb1	3095677412	13812770	0.00446195	376	1	0.63412	0.309874	0.690732	0.077559	0.92228	2247477802	8601310	0.00382709	376	2	374	0.00531915	7989	31	7958	0.00388034	8189	44	8145	0.00537306	1	0.694441	1	0.794415	0.947923	0.07303
wgEncodeHaibTfbsGm12878Ebfsc137065Pcr1xPkRep1.broadPeak|wgEncodeHaibTfbsGm12878Ebfsc137065Pcr1xPkRep2.broadPeak	2	broadPeak	wgEncodeHaibTfbs	Ebf	3095677412	27099299	0.00875392	376	0.677662	0.321369	0.751601	0.249378	0.181178	0.819018	2247477802	15391747	0.00684845	376	3	373	0.00797872	7989	56	7933	0.00700964	8189	79	8110	0.00964709	0.589288	0.666655	0.474195	0.535148	0.82128	0.167734
wgEncodeHaibTfbsGm12878Egr1V0416101PkRep1.broadPeak|wgEncodeHaibTfbsGm12878Egr1V0416101PkRep2.broadPeak	2	broadPeak	wgEncodeHaibTfbs	Egr1	3095677412	5475316	0.0017687	376	1	0.891779	0.896898	0.102948	0.248902	0.751009	2247477802	1719775	0.000765202	376	0	376	0	7989	7	7982	0.000876205	8189	7	8182	0.000854805	1	0.906251	1	0.936733	0.684756	0.330999
wgEncodeHaibTfbsGm12878Elf1sc631V0416101PkRep1.broadPeak|wgEncodeHaibTfbsGm12878Elf1sc631V0416101PkRep2.broadPeak	2	broadPeak	wgEncodeHaibTfbs	Elf1	3095677412	26091672	0.00842842	376	1	0.534729	0.259861	0.740688	0.034314	0.965582	2247477802	12174914	0.00541715	376	1	375	0.00265957	7989	33	7956	0.00413068	8189	159	8030	0.0194163	1	0.400001	1	0.748019	0.986454	0.005979
wgEncodeHaibTfbsGm12878Ets1Pcr1xPkRep1V2.broadPeak|wgEncodeHaibTfbsGm12878Ets1Pcr1xPkRep2V2.broadPeak	2	broadPeak	wgEncodeHaibTfbs	Ets1	3095677412	2598783	0.000839488	376	1	0.99037	1	0.812337	1	0.880345	2247477802	1094216	0.000486864	376	0	376	0	7989	3	7986	0.000375516	8189	5	8184	0.000610575	1	1	1	0.987807	0.760175	1
wgEncodeHaibTfbsGm12878Foxm1sc502V0422111PkRep1.broadPeak|wgEncodeHaibTfbsGm12878Foxm1sc502V0422111PkRep2.broadPeak	2	broadPeak	wgEncodeHaibTfbs	Foxm1	3095677412	28172307	0.00910053	376	0.182106	0.817969	0.388467	0.611477	0.428669	0.570975	2247477802	19783999	0.00880276	376	6	370	0.0159574	7989	67	7922	0.00838653	8189	89	8100	0.0108682	0.073771	0.626501	0.20039	0.813311	0.495797	0.555174
wgEncodeHaibTfbsGm12878GabpPcr2xPkRep1.broadPeak|wgEncodeHaibTfbsGm12878GabpPcr2xPkRep2.broadPeak	2	broadPeak	wgEncodeHaibTfbs	Gabp	3095677412	2458508	0.000794174	376	1	0.935224	0.164047	0.835732	0.007188	0.992879	2247477802	740024	0.000329269	376	0	376	0	7989	3	7986	0.000375516	8189	26	8163	0.00317499	1	0.674432	1	0.967822	0.999995	1e-06
wgEncodeHaibTfbsGm12878Irf4sc6059Pcr1xPkRep1.broadPeak|wgEncodeHaibTfbsGm12878Irf4sc6059Pcr1xPkRep2.broadPeak	2	broadPeak	wgEncodeHaibTfbs	Irf4	3095677412	19188617	0.00619852	376	0.126682	0.872881	0.751886	0.248309	0.455162	0.545522	2247477802	10308343	0.00458663	376	2	374	0.00531915	7989	37	7952	0.00463137	8189	40	8149	0.0048846	0.199996	0.842103	0.130851	0.884608	0.499203	0.515262
wgEncodeHaibTfbsGm12878Mef2aPcr1xPkRep1.broadPeak|wgEncodeHaibTfbsGm12878Mef2aPcr1xPkRep2.broadPeak	2	broadPeak	wgEncodeHaibTfbs	Mef2a	3095677412	11576168	0.00373946	376	0.068322	0.931191	0.685507	0.314089	0.92161	0.078783	2247477802	9810577	0.00436515	376	5	371	0.0132979	7989	35	7954	0.00438102	8189	22	8167	0.00268653	1e-06	1	0.082232	0.910723	0.071422	0.916377
wgEncodeHaibTfbsGm12878Mef2csc13268V0416101PkRep1.broadPeak|wgEncodeHaibTfbsGm12878Mef2csc13268V0416101PkRep2.broadPeak	2	broadPeak	wgEncodeHaibTfbs	Mef2c	3095677412	5258674	0.00169872	376	1	0.950708	0.403591	0.596615	1	0.514038	2247477802	4492628	0.00199896	376	4	372	0.0106383	7989	16	7973	0.00200275	8189	13	8176	0.0015875	1	1	1	0.967789	0.527131	1
wgEncodeHaibTfbsGm12878Mta3sc81325V0422111PkRep1.broadPeak|wgEncodeHaibTfbsGm12878Mta3sc81325V0422111PkRep2.broadPeak	2	broadPeak	wgEncodeHaibTfbs	Mta3	3095677412	44514582	0.0143796	376	0.152481	0.847238	0.42301	0.577856	0.211396	0.789353	2247477802	32288838	0.0143667	376	7	369	0.018617	7989	112	7877	0.0140193	8189	212	7977	0.0258884	0.238085	0.747748	0.190057	0.810769	0.809358	0.174617
wgEncodeHaibTfbsGm12878Nfatc1sc17834V0422111PkRep1.broadPeak|wgEncodeHaibTfbsGm12878Nfatc1sc17834V0422111PkRep2.broadPeak	2	broadPeak	wgEncodeHaibTfbs	Nfatc1	3095677412	22748507	0.00734847	376	0.114904	0.885491	0.093915	0.906691	0.33515	0.664203	2247477802	17649287	0.00785293	376	6	370	0.0159574	7989	61	7928	0.0076355	8189	71	8118	0.00867017	0.150001	0.878788	0.119168	0.858072	0.480071	0.467872
wgEncodeHaibTfbsGm12878Nficsc81335V0422111PkRep1.broadPeak|wgEncodeHaibTfbsGm12878Nficsc81335V0422111PkRep2.broadPeak	2	broadPeak	wgEncodeHaibTfbs	Nfic	3095677412	36547955	0.0118061	376	0.064187	0.935812	0.313688	0.687236	0.956673	0.043013	2247477802	28711037	0.0127748	376	7	369	0.018617	7989	93	7896	0.011641	8189	82	8107	0.0100134	2e-06	1	0.111114	0.882881	0.016822	0.978992
wgEncodeHaibTfbsGm12878NrsfPcr2xPkRep1.broadPeak|wgEncodeHaibTfbsGm12878NrsfPcr2xPkRep2.broadPeak	2	broadPeak	wgEncodeHaibTfbs	Nrsf	3095677412	1624979	0.000524919	376	1	0.910384	0.469923	0.53017	0.039463	0.96024	2247477802	1005184	0.00044725	376	1	375	0.00265957	7989	2	7987	0.000250344	8189	16	8173	0.00195384	1	0.615398	1	0.949054	0.980036	0.024082
wgEncodeHaibTfbsGm12878P300Pcr1xPkRep1.broadPeak|wgEncodeHaibTfbsGm12878P300Pcr1xPkRep2.broadPeak	2	broadPeak	wgEncodeHaibTfbs	P300	3095677412	9178961	0.00296509	376	1	0.915895	0.83327	0.166733	0.652052	0.348786	2247477802	2574361	0.00114544	376	0	376	0	7989	7	7982	0.000876205	8189	5	8184	0.000610575	1	1	1	0.958377	0.387817	0.638545
wgEncodeHaibTfbsGm12878Pax5c20Pcr1xPkRep1.broadPeak|wgEncodeHaibTfbsGm12878Pax5c20Pcr1xPkRep2.broadPeak	2	broadPeak	wgEncodeHaibTfbs	Pax5c20	3095677412	22381052	0.00722978	376	0.510763	0.488937	0.775808	0.224424	0.61784	0.382305	2247477802	9255720	0.00411827	376	2	374	0.00531915	7989	28	7961	0.00350482	8189	47	8142	0.00573941	0.714245	0.714285	0.313929	0.690185	0.254637	0.754388
wgEncodeHaibTfbsGm12878Pax5n19Pcr1xPkRep1.broadPeak|wgEncodeHaibTfbsGm12878Pax5n19Pcr1xPkRep2.broadPeak	2	broadPeak	wgEncodeHaibTfbs	Pax5n19	3095677412	26501691	0.00856087	376	1	0.649389	0.949993	0.049765	0.702231	0.297204	2247477802	11505043	0.00511909	376	2	374	0.00531915	7989	40	7949	0.00500688	8189	52	8137	0.00634998	1	1	1	0.795667	0.245961	0.768603
wgEncodeHaibTfbsGm12878Pbx3Pcr1xPkRep1.broadPeak|wgEncodeHaibTfbsGm12878Pbx3Pcr1xPkRep2.broadPeak	2	broadPeak	wgEncodeHaibTfbs	Pbx3	3095677412	8640882	0.00279127	376	1	0.916774	1	0.157679	0.244369	0.756091	2247477802	3743928	0.00166584	376	1	375	0.00265957	7989	9	7980	0.00112655	8189	14	8175	0.00170961	1	0.973546	1	0.95728	0.657101	0.402971
wgEncodeHaibTfbsGm12878Pmlsc71910V0422111PkRep1.broadPeak|wgEncodeHaibTfbsGm12878Pmlsc71910V0422111PkRep2.broadPeak	2	broadPeak	wgEncodeHaibTfbs	Pml	3095677412	31144204	0.0100605	376	0.237716	0.762325	0.349417	0.649066	0.185204	0.815372	2247477802	20894188	0.00929673	376	6	370	0.0159574	7989	72	7917	0.00901239	8189	125	8064	0.0152644	0.499992	0.812497	0.183618	0.790303	0.764625	0.231819
wgEncodeHaibTfbsGm12878Pol24h8Pcr1xPkRep1.broadPeak|wgEncodeHaibTfbsGm12878Pol24h8Pcr1xPkRep2.broadPeak	2	broadPeak	wgEncodeHaibTfbs	Pol24h8	3095677412	68936667	0.0222687	376	0.162768	0.837659	0.347616	0.651358	0.002833	0.997163	2247477802	42307178	0.0188243	376	8	368	0.0212766	7989	136	7853	0.0170234	8189	608	7581	0.0742459	0.797695	0.315759	0.159775	0.764484	1	1e-06
wgEncodeHaibTfbsGm12878Pol2Pcr2xPkRep1.broadPeak|wgEncodeHaibTfbsGm12878Pol2Pcr2xPkRep2.broadPeak	2	broadPeak	wgEncodeHaibTfbs	Pol2	3095677412	34792122	0.0112389	376	0.783822	0.21635	0.201562	0.798686	0.000765	0.999136	2247477802	16427834	0.00730945	376	3	373	0.00797872	7989	52	7937	0.00650895	8189	369	7820	0.0450604	1	1e-06	0.559733	0.416236	1	1e-06
wgEncodeHaibTfbsGm12878Pou2f2Pcr1xPkRep2.broadPeak|wgEncodeHaibTfbsGm12878Pou2f2Pcr1xPkRep3.broadPeak|wgEncodeHaibTfbsGm12878Pu1Pcr1xPkRep1.broadPeak	3	broadPeak	wgEncodeHaibTfbs	Pou2f2	3095677412	34416673	0.0111177	376	1	0.905442	0.822645	0.177471	0.418468	0.581054	2247477802	15705408	0.00698801	376	5	371	0.0132979	7989	57	7932	0.00713481	8189	64	8125	0.00781536	1	0.999993	1	0.956484	0.547675	0.434369
wgEncodeHaibTfbsGm12878Pu1Pcr1xPkRep2.broadPeak|wgEncodeHaibTfbsGm12878Pu1Pcr1xPkRep3.broadPeak|wgEncodeHaibTfbsGm12878Rad21V0416101PkRep1.broadPeak	3	broadPeak	wgEncodeHaibTfbs	Pu1	3095677412	36106257	0.0116634	376	1	0.96756	1	0.49634	1	0.633844	2247477802	25591992	0.011387	376	6	370	0.0159574	7989	80	7909	0.0100138	8189	129	8060	0.0157528	1	1	1	0.984675	0.681571	1
wgEncodeHaibTfbsGm12878Rad21V0416101PkRep1.broadPeak|wgEncodeHaibTfbsGm12878Rad21V0416101PkRep2.broadPeak	2	broadPeak	wgEncodeHaibTfbs	Rad21	3095677412	13657140	0.00441168	376	0.148315	0.852627	0.91799	0.082325	0.146197	0.853167	2247477802	11204289	0.00498527	376	1	375	0.00265957	7989	28	7961	0.00350482	8189	59	8130	0.00720479	0.295455	0.781245	0.168182	0.815051	0.876652	0.123261
wgEncodeHaibTfbsGm12878Runx3sc101553V0422111PkRep1.broadPeak|wgEncodeHaibTfbsGm12878Runx3sc101553V0422111PkRep2.broadPeak	2	broadPeak	wgEncodeHaibTfbs	Runx3	3095677412	58670710	0.0189525	376	0.053899	0.94618	0.39657	0.604615	0.430721	0.567792	2247477802	45144736	0.0200868	376	9	367	0.0239362	7989	146	7843	0.0182751	8189	192	7997	0.0234461	0.153109	0.883723	0.110639	0.864541	0.621362	0.405292
wgEncodeHaibTfbsGm12878RxraPcr1xPkRep1.broadPeak|wgEncodeHaibTfbsGm12878RxraPcr1xPkRep2.broadPeak	2	broadPeak	wgEncodeHaibTfbs	Rxra	3095677412	3131050	0.00101143	376	1	0.98746	0.207148	0.793392	1	0.842004	2247477802	768572	0.000341971	376	0	376	0	7989	5	7984	0.000625861	8189	2	8187	0.00024423	1	1	1	0.990028	0.72839	1
wgEncodeHaibTfbsGm12878Six5Pcr1xPkRep1.broadPeak|wgEncodeHaibTfbsGm12878Six5Pcr1xPkRep2.broadPeak	2	broadPeak	wgEncodeHaibTfbs	Six5	3095677412	4914282	0.00158747	376	1	0.936245	0.621098	0.378252	1	0.406843	2247477802	1432612	0.000637431	376	0	376	0	7989	6	7983	0.000751033	8189	6	8183	0.00073269	1	1	1	0.968486	0.460627	1
wgEncodeHaibTfbsGm12878Sp1Pcr1xPkRep1.broadPeak|wgEncodeHaibTfbsGm12878Sp1Pcr1xPkRep2.broadPeak	2	broadPeak	wgEncodeHaibTfbs	Sp1	3095677412	21978093	0.00709961	376	0.214787	0.78527	0.396536	0.603272	0.431931	0.568681	2247477802	9237265	0.00411006	376	2	374	0.00531915	7989	34	7955	0.00425585	8189	35	8154	0.00427403	0.233329	0.814279	0.183892	0.805548	0.435943	0.469224
wgEncodeHaibTfbsGm12878SrfPcr2xPkRep1.broadPeak|wgEncodeHaibTfbsGm12878SrfPcr2xPkRep2.broadPeak	2	broadPeak	wgEncodeHaibTfbs	Srf	3095677412	1387762	0.00044829	376	1	0.973332	1	0.562745	0.052208	0.947844	2247477802	461074	0.000205152	376	0	376	0	7989	1	7988	0.000125172	8189	3	8186	0.000366345	1	0.972223	1	0.98643	0.941091	0.031042
wgEncodeHaibTfbsGm12878SrfV0416101PkRep1.broadPeak|wgEncodeHaibTfbsGm12878SrfV0416101PkRep2.broadPeak	2	broadPeak	wgEncodeHaibTfbs	Srf	3095677412	2968520	0.000958924	376	1	0.890152	1	0.083769	0.224899	0.77552	2247477802	1831692	0.000814999	376	0	376	0	7989	5	7984	0.000625861	8189	3	8186	0.000366345	1	1	1	0.960561	0.786119	0.242115
wgEncodeHaibTfbsGm12878Stat5asc74442V0422111PkRep1.broadPeak|wgEncodeHaibTfbsGm12878Stat5asc74442V0422111PkRep2.broadPeak	2	broadPeak	wgEncodeHaibTfbs	Stat5a	3095677412	25610304	0.00827292	376	0.212168	0.788332	0.143558	0.856734	0.08948	0.910606	2247477802	17061829	0.00759155	376	4	372	0.0106383	7989	60	7929	0.00751033	8189	100	8089	0.0122115	0.356432	0.333334	0.192541	0.799653	0.920526	0.059869
wgEncodeHaibTfbsGm12878Taf1Pcr1xPkRep1.broadPeak|wgEncodeHaibTfbsGm12878Taf1Pcr1xPkRep2.broadPeak	2	broadPeak	wgEncodeHaibTfbs	Taf1	3095677412	11031415	0.00356349	376	1	0.810965	0.605487	0.394271	0.14371	0.856612	2247477802	4710405	0.00209586	376	0	376	0	7989	9	7980	0.00112655	8189	18	8171	0.00219807	1	0.7	1	0.879103	0.843827	0.18071
wgEncodeHaibTfbsGm12878Tcf12Pcr1xPkRep1.broadPeak|wgEncodeHaibTfbsGm12878Tcf12Pcr1xPkRep2.broadPeak	2	broadPeak	wgEncodeHaibTfbs	Tcf12	3095677412	15767510	0.0050934	376	0.274294	0.725349	0.572975	0.427505	0.294945	0.705928	2247477802	6822377	0.00303557	376	2	374	0.00531915	7989	15	7974	0.00187758	8189	36	8153	0.00439614	0.150443	0.625005	0.206872	0.784287	0.589879	0.398881
wgEncodeHaibTfbsGm12878Tcf3Pcr1xPkRep1.broadPeak|wgEncodeHaibTfbsGm12878Tcf3Pcr1xPkRep2.broadPeak	2	broadPeak	wgEncodeHaibTfbs	Tcf3	3095677412	18729337	0.00605016	376	1	0.651638	0.668077	0.332181	0.195765	0.804576	2247477802	6788056	0.0030203	376	1	375	0.00265957	7989	19	7970	0.00237827	8189	39	8150	0.00476249	1	0.500015	1	0.79426	0.705857	0.323389
wgEncodeHaibTfbsGm12878Usf1Pcr2xPkRep1.broadPeak|wgEncodeHaibTfbsGm12878Usf1Pcr2xPkRep2.broadPeak	2	broadPeak	wgEncodeHaibTfbs	Usf1	3095677412	2634011	0.000850867	376	0.06669	0.934004	0.573788	0.427635	0.069849	0.92932	2247477802	1209896	0.000538335	376	1	375	0.00265957	7989	5	7984	0.000625861	8189	10	8179	0.00122115	0.220777	0.695659	0.039704	0.962849	0.903077	0.085379
wgEncodeHaibTfbsGm12878Yy1sc281Pcr1xPkRep1.broadPeak|wgEncodeHaibTfbsGm12878Yy1sc281Pcr1xPkRep2.broadPeak	2	broadPeak	wgEncodeHaibTfbs	Yy1	3095677412	22364570	0.00722445	376	1	0.354595	0.79177	0.208109	0.076499	0.924121	2247477802	13002804	0.00578551	376	2	374	0.00531915	7989	36	7953	0.0045062	8189	72	8117	0.00879228	1	0.380954	1	0.601129	0.973088	0.027537
wgEncodeHaibTfbsGm12878Zbtb33Pcr1xPkRep1.broadPeak|wgEncodeHaibTfbsGm12878Zbtb33Pcr1xPkRep2.broadPeak	2	broadPeak	wgEncodeHaibTfbs	Zbtb33	3095677412	8031187	0.00259432	376	1	0.883075	0.881522	0.118985	1	0.241571	2247477802	1380146	0.000614087	376	0	376	0	7989	7	7982	0.000876205	8189	2	8187	0.00024423	1	1	1	0.913459	0.203887	1
wgEncodeHaibTfbsGm12878Zeb1sc25388V0416102PkRep1.broadPeak|wgEncodeHaibTfbsGm12878Zeb1sc25388V0416102PkRep2.broadPeak	2	broadPeak	wgEncodeHaibTfbs	Zeb1	3095677412	8626500	0.00278663	376	1	0.937053	0.695545	0.304454	0.249686	0.749363	2247477802	3589027	0.00159691	376	2	374	0.00531915	7989	12	7977	0.00150207	8189	34	8155	0.00415191	1	0.97391	1	0.968315	0.664122	0.330608
wgEncodeOpenChromChipGm12878CmycPk.narrowPeak	1	narrowPeak	wgEncodeOpenChromChip	ChIP cMyc	3095677412	2729934	0.000881854	376	1	0.845883	0.428334	0.571201	0.21633	0.784008	2247477802	999504	0.000444723	376	0	376	0	7989	4	7985	0.000500688	8189	5	8184	0.000610575	1	0.874998	1	0.907144	0.746338	0.290692
wgEncodeOpenChromChipGm12878CtcfPkRep1.narrowPeak	1	narrowPeak	wgEncodeOpenChromChip	ChIP Ctcf	3095677412	13021046	0.0042062	376	0.300473	0.700406	0.966654	0.033421	0.016861	0.983097	2247477802	9777022	0.00435022	376	2	374	0.00531915	7989	31	7958	0.00388034	8189	75	8114	0.00915863	0.538458	0.515627	0.262863	0.722204	0.998452	0.004788
wgEncodeOpenChromChipGm12878Pol2Pk.narrowPeak	1	narrowPeak	wgEncodeOpenChromChip	ChIP Pol2	3095677412	27549350	0.0088993	376	0.837823	0.162155	0.20257	0.79806	0.019518	0.980339	2247477802	16343632	0.00727199	376	1	375	0.00265957	7989	67	7922	0.00838653	8189	209	7980	0.025522	1	1e-06	0.7325	0.270289	0.999969	0.007006
wgEncodeOpenChromDnaseGm12878Pk.narrowPeak	1	narrowPeak	wgEncodeOpenChromDnase	DNAseI HS	3095677412	60467666	0.0195329	376	0.797131	0.203005	0.965668	0.033963	0.005362	0.994585	2247477802	37719444	0.016783	376	6	370	0.0159574	7989	116	7873	0.01452	8189	256	7933	0.0312614	0.96875	0.076926	0.645833	0.342947	1	1e-06
wgEncodeOpenChromFaireGm12878Pk.narrowPeak	1	narrowPeak	wgEncodeOpenChromFaire	FAIRE	3095677412	18925732	0.0061136	376	0.086481	0.913589	0.999105	0.000813	0.038762	0.961558	2247477802	14766998	0.00657048	376	5	371	0.0132979	7989	30	7959	0.00375516	8189	78	8111	0.00952497	0.322314	0.597784	0.133043	0.860366	0.992345	0.005418
wgEncodeOpenChromSynthGm12878Pk.bed	1	bed	wgEncodeOpenChromSynth	Synth	3095677412	72570890	0.0234427	376	0.280479	0.819532	0.968845	0.03763	0.001362	0.99877	2247477802	47705297	0.0212261	376	10	366	0.0265957	7989	146	7843	0.0182751	8189	310	7879	0.0378557	0.744186	0.333334	0.353832	0.818185	1	1e-06
wgEncodeSunyAlbanyGeneStGm12878Celf1RbpAssocRnaV2.broadPeak	1	broadPeak	wgEncodeSunyAlbanyGeneSt	Celf1 RBP Assoc RNA V2	3095677412	22385068	0.00723107	376	0.713526	0.286004	0.980542	0.019618	0.042317	0.95704	2247477802	18480885	0.00822294	376	2	374	0.00531915	7989	52	7937	0.00650895	8189	106	8083	0.0129442	0.874999	0.055559	0.544541	0.435959	1	1e-06
wgEncodeSunyAlbanyGeneStGm12878Elavl1RbpAssocRnaV2.broadPeak	1	broadPeak	wgEncodeSunyAlbanyGeneSt	Elavl1 RBP Assoc RNA V2	3095677412	298872393	0.0965451	376	0.977522	0.022393	0.997333	0.002666	0.003898	0.99598	2247477802	243699063	0.108432	376	30	346	0.0797872	7989	827	7162	0.103517	8189	1849	6340	0.225791	1	1e-06	0.84846	0.171058	1	1e-06
wgEncodeSunyAlbanyGeneStGm12878Igf2bp1RbpAssocRnaV2.broadPeak	1	broadPeak	wgEncodeSunyAlbanyGeneSt	Igf2bp1 RBP Assoc RNA V2	3095677412	103624633	0.033474	376	0.294145	0.705364	0.597465	0.402665	0.00099	0.999063	2247477802	78254859	0.034819	376	12	364	0.0319149	7989	264	7725	0.0330454	8189	944	7245	0.115277	1	1e-06	0.315465	0.668027	1	1e-06
wgEncodeSunyAlbanyGeneStGm12878Pabpc1RbpAssocRnaV2.broadPeak	1	broadPeak	wgEncodeSunyAlbanyGeneSt	Pabpc1 RBP Assoc RNA V2	3095677412	358048766	0.115661	376	0.457557	0.543256	0.773678	0.226459	0.002469	0.997388	2247477802	289226105	0.128689	376	41	335	0.109043	7989	1013	6976	0.126799	8189	2465	5724	0.301014	1	1e-06	0.375582	0.640905	1	1e-06
wgEncodeSunyAlbanyGeneStGm12878RipinputRbpAssocRnaV2.broadPeak	1	broadPeak	wgEncodeSunyAlbanyGeneSt	RIP input V2	3095677412	731739784	0.236375	376	0.307158	0.691391	0.943686	0.056156	1e-05	0.99999	2247477802	581258081	0.258627	376	92	284	0.244681	7989	2023	5966	0.253223	8189	5215	2974	0.63683	1	1e-06	0.292629	0.691372	1	1e-06
wgEncodeSunyAlbanyGeneStGm12878SlbpRbpAssocRnaV2.broadPeak	1	broadPeak	wgEncodeSunyAlbanyGeneSt	Slbp RBP Assoc RNA V2	3095677412	211420711	0.0682955	376	0.997762	0.002346	0.293927	0.707245	0.000891	0.999114	2247477802	166115598	0.073912	376	17	359	0.0452128	7989	589	7400	0.0737264	8189	1322	6867	0.161436	1	1e-06	0.970058	0.026688	1	1e-06
wgEncodeSunyAlbanyGeneStGm12878T7tagRbpAssocRnaV2.broadPeak	1	broadPeak	wgEncodeSunyAlbanyGeneSt	T7tag RBP Assoc RNA V2	3095677412	205387	6.63464e-05	376	1	0.97502	0.340058	0.78273	0.005713	0.99446	2247477802	152765	6.79718e-05	376	0	376	0	7989	1	7988	0.000125172	8189	13	8176	0.0015875	1	0.669564	1	0.981699	1	1e-06
wgEncodeSunyAlbanyTilingGm12878Elavl1RbpAssocRna.broadPeak	1	broadPeak	wgEncodeSunyAlbanyTiling	Elavl1 RBP Assoc RNA	3095677412	779040	0.000251654	376	1	0.881326	0.305942	0.694125	1	0.298388	2247477802	758147	0.000337332	376	0	376	0	7989	4	7985	0.000500688	8189	0	8189	0	1	1	1	0.951584	0.342717	1
wgEncodeSunyAlbanyTilingGm12878Pabpc1RbpAssocRna.broadPeak	1	broadPeak	wgEncodeSunyAlbanyTiling	Pabpc1 RBP Assoc RNA	3095677412	773107	0.000249738	376	1	0.918003	0.417951	0.582573	0.000196	0.999821	2247477802	512143	0.000227875	376	0	376	0	7989	2	7987	0.000250344	8189	83	8106	0.0101355	1	0.249999	1	0.951006	1	1e-06
wgEncodeSunyAlbanyTilingGm12878RipinputRbpAssocRna.broadPeak	1	broadPeak	wgEncodeSunyAlbanyTiling	RIP input	3095677412	770643	0.000248942	376	1	0.96196	1	0.441249	0.000151	0.999839	2247477802	231048	0.000102803	376	0	376	0	7989	0	7989	0	8189	43	8146	0.00525095	1	0.222252	1	0.9819	1	1e-06
wgEncodeSunyAlbanyTilingGm12878T7tagRbpAssocRna.broadPeak	1	broadPeak	wgEncodeSunyAlbanyTiling	T7tag RBP Assoc RNA	3095677412	778062	0.000251338	376	1	0.972459	1	0.553215	0.000135	0.999892	2247477802	167014	7.43117e-05	376	0	376	0	7989	0	7989	0	8189	34	8155	0.00415191	1	0.460125	1	0.986518	1	1e-06
wgEncodeSydhTfbsGm12878Bhlhe40cIggmusPk.narrowPeak	1	narrowPeak	wgEncodeSydhTfbs	Bhlhe40c	3095677412	28042779	0.00905869	376	0.059845	0.93972	0.905962	0.093645	0.371029	0.628705	2247477802	19359511	0.00861388	376	8	368	0.0212766	7989	61	7928	0.0076355	8189	75	8114	0.00915863	0.03704	0.70213	0.088231	0.892822	0.683608	0.366709
wgEncodeSydhTfbsGm12878Brca1a300IggmusPk.narrowPeak	1	narrowPeak	wgEncodeSydhTfbs	Brca1	3095677412	3833158	0.00123823	376	1	0.720876	0.338855	0.661229	0.026776	0.973472	2247477802	1958656	0.000871491	376	0	376	0	7989	11	7978	0.00137689	8189	16	8173	0.00195384	1	0.588234	1	0.810347	0.97143	0.029642
wgEncodeSydhTfbsGm12878Cdpsc6327IggmusPk.narrowPeak	1	narrowPeak	wgEncodeSydhTfbs	Cdp	3095677412	13197610	0.00426324	376	0.101033	0.898942	0.948027	0.052296	0.969785	0.030214	2247477802	11456337	0.00509742	376	5	371	0.0132979	7989	34	7955	0.00425585	8189	19	8170	0.00232019	1e-06	0.855671	0.104479	0.873337	0.026324	0.980164
wgEncodeSydhTfbsGm12878CfosStdPk.narrowPeak	1	narrowPeak	wgEncodeSydhTfbs	Cfos	3095677412	573182	0.000185156	376	1	0.962512	0.291857	0.708927	0.094692	0.905177	2247477802	228409	0.000101629	376	0	376	0	7989	1	7988	0.000125172	8189	2	8187	0.00024423	1	0.969512	1	0.981852	0.88121	0.117088
wgEncodeSydhTfbsGm12878Chd1a301218aIggmusPk.narrowPeak	1	narrowPeak	wgEncodeSydhTfbs	Chd1	3095677412	18161572	0.00586675	376	0.077492	0.922795	0.841734	0.159129	0.019766	0.980059	2247477802	11916026	0.00530195	376	5	371	0.0132979	7989	31	7958	0.00388034	8189	57	8132	0.00696056	6e-06	0.719992	0.101876	0.893166	0.988562	0.013616
wgEncodeSydhTfbsGm12878Chd2ab68301IggmusPk.narrowPeak	1	narrowPeak	wgEncodeSydhTfbs	Chd2	3095677412	22824344	0.00737297	376	0.102441	0.897864	0.785945	0.213491	0.022375	0.977965	2247477802	14316620	0.00637008	376	6	370	0.0159574	7989	49	7940	0.00613343	8189	76	8113	0.00928074	0.475002	0.666658	0.117274	0.871238	0.992836	0.008425
wgEncodeSydhTfbsGm12878Corestsc30189IggmusPk.narrowPeak	1	narrowPeak	wgEncodeSydhTfbs	Corest	3095677412	20423114	0.0065973	376	0.134811	0.865061	0.490109	0.509694	0.161808	0.838548	2247477802	14166863	0.00630345	376	4	372	0.0106383	7989	47	7942	0.00588309	8189	60	8129	0.0073269	0.161906	0.816324	0.184991	0.841591	0.907766	0.109773
wgEncodeSydhTfbsGm12878Ctcfsc15914c20StdPk.narrowPeak	1	narrowPeak	wgEncodeSydhTfbs	Ctcf	3095677412	27383306	0.00884566	376	0.53386	0.466622	0.987814	0.012007	0.005895	0.993959	2247477802	20265938	0.00901719	376	2	374	0.00531915	7989	57	7932	0.00713481	8189	120	8069	0.0146538	0.769234	1e-06	0.437605	0.54445	1	1e-06
wgEncodeSydhTfbsGm12878E2f4IggmusPk.narrowPeak	1	narrowPeak	wgEncodeSydhTfbs	E2f4	3095677412	2764110	0.000892893	376	1	0.827666	0.351926	0.649127	0.083832	0.916109	2247477802	1135032	0.000505025	376	0	376	0	7989	4	7985	0.000500688	8189	9	8180	0.00109904	1	0.767244	1	0.908272	0.909702	0.082719
wgEncodeSydhTfbsGm12878Ebf1sc137065StdPk.narrowPeak	1	narrowPeak	wgEncodeSydhTfbs	Ebf1	3095677412	37444554	0.0120958	376	0.292434	0.707745	0.770364	0.230184	0.454156	0.545391	2247477802	30383507	0.0135189	376	7	369	0.018617	7989	99	7890	0.012392	8189	106	8083	0.0129442	0.47058	0.666679	0.304343	0.737742	0.623704	0.445344
wgEncodeSydhTfbsGm12878Elk112771IggmusPk.narrowPeak	1	narrowPeak	wgEncodeSydhTfbs	Elk1	3095677412	10029842	0.00323995	376	0.132782	0.866951	0.693309	0.307211	0.081445	0.918481	2247477802	5830837	0.00259439	376	3	373	0.00797872	7989	17	7972	0.00212793	8189	39	8150	0.00476249	0.299998	0.749999	0.176368	0.837902	0.940864	0.056509
wgEncodeSydhTfbsGm12878ErraIggrabPk.narrowPeak	1	narrowPeak	wgEncodeSydhTfbs	Erra	3095677412	2893357	0.000934644	376	1	0.755991	0.843229	0.156686	0.16734	0.832441	2247477802	1679645	0.000747347	376	0	376	0	7989	4	7985	0.000500688	8189	10	8179	0.00122115	1	0.999985	1	0.868164	0.847681	0.155835
wgEncodeSydhTfbsGm12878Gcn5StdPk.narrowPeak	1	narrowPeak	wgEncodeSydhTfbs	Gcn5	3095677412	1227625	0.000396561	376	1	0.896217	0.317074	0.683236	0.032734	0.96731	2247477802	656469	0.000292091	376	0	376	0	7989	4	7985	0.000500688	8189	3	8186	0.000366345	1	0.999999	1	0.929036	0.968216	0.033739
wgEncodeSydhTfbsGm12878Ikzf1iknuclaStdPk.narrowPeak	1	narrowPeak	wgEncodeSydhTfbs	Ikzf1	3095677412	14060026	0.00454183	376	0.717997	0.282697	0.458396	0.541513	0.467707	0.532898	2247477802	12657496	0.00563187	376	2	374	0.00531915	7989	44	7945	0.00550757	8189	33	8156	0.0040298	0.681155	0.481466	0.596036	0.434283	0.540814	0.488499
wgEncodeSydhTfbsGm12878Irf3IggmusPk.narrowPeak	1	narrowPeak	wgEncodeSydhTfbs	Irf3	3095677412	2826949	0.000913192	376	1	0.719936	0.610816	0.389218	0.390243	0.609356	2247477802	1968256	0.000875762	376	0	376	0	7989	8	7981	0.00100138	8189	9	8180	0.00109904	1	0.999986	1	0.834379	0.592682	0.434289
wgEncodeSydhTfbsGm12878JundIggrabPk.narrowPeak	1	narrowPeak	wgEncodeSydhTfbs	Jund	3095677412	2532942	0.000818219	376	1	0.741059	0.839158	0.16206	0.891963	0.107105	2247477802	1786589	0.000794931	376	0	376	0	7989	4	7985	0.000500688	8189	2	8187	0.00024423	1	0.999998	1	0.864835	0.091086	0.928543
wgEncodeSydhTfbsGm12878JundStdPk.narrowPeak	1	narrowPeak	wgEncodeSydhTfbs	Jund	3095677412	501540	0.000162013	376	1	0.922163	1	0.176206	0.591541	0.409502	2247477802	488105	0.000217179	376	0	376	0	7989	0	7989	0	8189	1	8188	0.000122115	1	0.999993	1	0.964739	0.474024	0.518369
wgEncodeSydhTfbsGm12878MafkIggmusPk.narrowPeak	1	narrowPeak	wgEncodeSydhTfbs	Mafk	3095677412	2243187	0.000724619	376	1	0.716019	0.837309	0.162648	0.420448	0.579235	2247477802	2000366	0.000890049	376	0	376	0	7989	4	7985	0.000500688	8189	5	8184	0.000610575	1	0.999969	1	0.850407	0.548001	0.448049
wgEncodeSydhTfbsGm12878MaxIggmusPk.narrowPeak	1	narrowPeak	wgEncodeSydhTfbs	Max	3095677412	21722934	0.00701718	376	0.060013	0.940004	0.91356	0.086598	0.004462	0.995436	2247477802	12465066	0.00554625	376	5	371	0.0132979	7989	32	7957	0.00400551	8189	78	8111	0.00952497	0.75	0.672131	0.0984	0.89317	0.99652	0.00083
wgEncodeSydhTfbsGm12878MaxStdPk.narrowPeak	1	narrowPeak	wgEncodeSydhTfbs	Max	3095677412	289491	9.35146e-05	376	0.000169	0.999884	0.50948	0.489935	0.027324	0.973204	2247477802	208834	9.29193e-05	376	1	375	0.00265957	7989	1	7988	0.000125172	8189	8	8181	0.00097692	1e-06	1	0.000279	0.999998	0.965911	0.016392
wgEncodeSydhTfbsGm12878Mazab85725IggmusPk.narrowPeak	1	narrowPeak	wgEncodeSydhTfbs	Maz	3095677412	25528469	0.00824649	376	0.205106	0.795562	0.984356	0.01561	0.265248	0.734409	2247477802	14910651	0.00663439	376	3	373	0.00797872	7989	35	7954	0.00438102	8189	51	8138	0.00622787	0.310348	0.500002	0.207712	0.784914	0.869887	0.115872
wgEncodeSydhTfbsGm12878Mxi1IggmusPk.narrowPeak	1	narrowPeak	wgEncodeSydhTfbs	Mxi1	3095677412	27425889	0.00885941	376	0.229805	0.770351	0.000408	0.999666	0.025914	0.973789	2247477802	18197428	0.00809682	376	5	371	0.0132979	7989	66	7923	0.00826136	8189	90	8099	0.0109904	0.645164	0.314297	0.246181	0.768342	0.985402	0.005192
wgEncodeSydhTfbsGm12878Nfe2sc22827StdPk.narrowPeak	1	narrowPeak	wgEncodeSydhTfbs	Nfe2	3095677412	1988875	0.000642468	376	0.052293	0.948189	0.516586	0.484353	0.522477	0.477104	2247477802	1436914	0.000639345	376	1	375	0.00265957	7989	5	7984	0.000625861	8189	5	8184	0.000610575	1e-06	0.971963	0.039569	0.951345	0.509953	0.517392
wgEncodeSydhTfbsGm12878NfkbTnfaIggrabPk.narrowPeak	1	narrowPeak	wgEncodeSydhTfbs	NfkbTnfa	3095677412	5581526	0.00180301	376	0.289585	0.709012	0.448275	0.553012	0.176573	0.823091	2247477802	5028517	0.0022374	376	2	374	0.00531915	7989	18	7971	0.0022531	8189	21	8168	0.00256442	0.304335	0.702701	0.374456	0.713584	0.900002	0.129413
wgEncodeSydhTfbsGm12878NfyaIggmusPk.narrowPeak	1	narrowPeak	wgEncodeSydhTfbs	Nfya	3095677412	2824032	0.00091225	376	1	0.717855	0.947382	0.052546	0.404749	0.595088	2247477802	1982997	0.000882321	376	0	376	0	7989	3	7986	0.000375516	8189	8	8181	0.00097692	1	0.928571	1	0.837418	0.556824	0.438687
wgEncodeSydhTfbsGm12878NfybIggmusPk.narrowPeak	1	narrowPeak	wgEncodeSydhTfbs	Nfyb	3095677412	10802485	0.00348954	376	0.558598	0.442674	0.754726	0.243878	0.168514	0.832299	2247477802	7430457	0.00330613	376	2	374	0.00531915	7989	20	7969	0.00250344	8189	26	8163	0.00317499	0.426828	0.555557	0.438464	0.574654	0.755873	0.240261
wgEncodeSydhTfbsGm12878Nrf1IggmusPk.narrowPeak	1	narrowPeak	wgEncodeSydhTfbs	Nrf1	3095677412	8250885	0.00266529	376	1	0.511122	0.131401	0.867773	0.012505	0.987381	2247477802	4016252	0.001787	376	0	376	0	7989	20	7969	0.00250344	8189	21	8168	0.00256442	1	0.759997	1	0.699048	0.994218	0.006599
wgEncodeSydhTfbsGm12878P300bStdPk.narrowPeak	1	narrowPeak	wgEncodeSydhTfbs	P300b	3095677412	23697951	0.00765517	376	0.057706	0.941723	0.625865	0.375016	0.657991	0.34226	2247477802	19107012	0.00850154	376	8	368	0.0212766	7989	61	7928	0.0076355	8189	57	8132	0.00696056	0.080001	0.500029	0.105694	0.898089	0.365699	0.660669
wgEncodeSydhTfbsGm12878P300IggmusPk.narrowPeak	1	narrowPeak	wgEncodeSydhTfbs	P300	3095677412	20025391	0.00646882	376	0.150925	0.849731	0.868331	0.131664	0.911368	0.088622	2247477802	16111429	0.00716867	376	6	370	0.0159574	7989	47	7942	0.00588309	8189	39	8150	0.00476249	2.8e-05	0.792687	0.14507	0.818943	0.081409	0.900803
wgEncodeSydhTfbsGm12878P300sc584IggmusPk.narrowPeak	1	narrowPeak	wgEncodeSydhTfbs	P300	3095677412	13157146	0.00425017	376	0.110765	0.888678	0.51533	0.484675	0.2796	0.720976	2247477802	9836399	0.00437664	376	3	373	0.00797872	7989	32	7957	0.00400551	8189	39	8150	0.00476249	0.175674	0.875	0.13824	0.854224	0.690281	0.322342
wgEncodeSydhTfbsGm12878Pol2IggmusPk.narrowPeak	1	narrowPeak	wgEncodeSydhTfbs	Pol2	3095677412	29351907	0.00948158	376	0.402227	0.59643	0.75007	0.250852	0.001075	0.999001	2247477802	19425701	0.00864333	376	4	372	0.0106383	7989	57	7932	0.00713481	8189	228	7961	0.0278422	0.934782	0.039372	0.369643	0.629729	1	1e-06
wgEncodeSydhTfbsGm12878Pol2s2IggmusPk.narrowPeak	1	narrowPeak	wgEncodeSydhTfbs	Pol2s2	3095677412	43934266	0.0141921	376	0.326375	0.673508	0.544502	0.456179	0.000235	0.999767	2247477802	32445839	0.0144366	376	5	371	0.0132979	7989	106	7883	0.0132682	8189	455	7734	0.0555623	0.973913	1e-06	0.316837	0.681218	0.999999	1e-06
wgEncodeSydhTfbsGm12878Pol2StdPk.narrowPeak	2	narrowPeak	wgEncodeSydhTfbs	Pol2	3095677412	6727793	0.00217329	376	0.204008	0.796564	0.006458	0.993424	0.007916	0.991878	2247477802	3469105	0.00154355	376	1	375	0.00265957	7989	18	7971	0.0022531	8189	46	8143	0.00561729	0.63637	0.28573	0.286309	0.753803	1	0.001126
wgEncodeSydhTfbsGm12878Pol3StdPk.narrowPeak	2	narrowPeak	wgEncodeSydhTfbs	Pol3	3095677412	64371	2.07938e-05	376	1	0.991943	0.157617	0.844222	0.080693	0.919863	2247477802	48239	2.14636e-05	376	0	376	0	7989	1	7988	0.000125172	8189	1	8188	0.000122115	1	0.926835	1	0.999943	0.807188	0.187331
wgEncodeSydhTfbsGm12878Rad21IggrabPk.narrowPeak	2	narrowPeak	wgEncodeSydhTfbs	Rad21	3095677412	10530880	0.0034018	376	0.348696	0.652054	0.764963	0.235608	0.035768	0.964227	2247477802	8771743	0.00390293	376	1	375	0.00265957	7989	27	7962	0.00337965	8189	56	8133	0.00683844	0.636358	0.523806	0.338219	0.667702	0.995788	0.004714
wgEncodeSydhTfbsGm12878Rfx5200401194IggmusPk.narrowPeak	1	narrowPeak	wgEncodeSydhTfbs	Rfx	3095677412	8435314	0.00272487	376	0.121048	0.878219	0.624083	0.375589	0.008864	0.991293	2247477802	5177453	0.00230367	376	3	373	0.00797872	7989	14	7975	0.00175241	8189	26	8163	0.00317499	0.263158	0.846141	0.140926	0.857406	0.993859	0.008569
wgEncodeSydhTfbsGm12878Sin3anb6001263IggmusPk.narrowPeak	2	narrowPeak	wgEncodeSydhTfbs	Sin3	3095677412	10787615	0.00348473	376	0.392912	0.607065	0.973844	0.025834	0.007069	0.993033	2247477802	4934858	0.00219573	376	1	375	0.00265957	7989	10	7979	0.00125172	8189	43	8146	0.00525095	0.636362	0.434777	0.2972	0.698951	0.999266	1e-06
wgEncodeSydhTfbsGm12878Smc3ab9263IggmusPk.narrowPeak	2	narrowPeak	wgEncodeSydhTfbs	Smc3	3095677412	23735299	0.00766724	376	0.183009	0.817121	0.945816	0.054032	0.02175	0.978482	2247477802	19047175	0.00847491	376	3	373	0.00797872	7989	58	7931	0.00725998	8189	98	8091	0.0119673	0.493589	0.392875	0.239198	0.781992	0.990068	0.013126
wgEncodeSydhTfbsGm12878Spt20StdPk.narrowPeak	2	narrowPeak	wgEncodeSydhTfbs	Spt20	3095677412	2383366	0.000769901	376	0.151438	0.84882	0.36077	0.638287	0.878346	0.121753	2247477802	2065993	0.00091925	376	1	375	0.00265957	7989	11	7978	0.00137689	8189	4	8185	0.00048846	0.125	0.888885	0.100459	0.893099	0.146839	0.841275
wgEncodeSydhTfbsGm12878Srebp1IggrabPk.narrowPeak	2	narrowPeak	wgEncodeSydhTfbs	Srebp1	3095677412	2094797	0.000676685	376	0.047089	0.953207	0.757869	0.242377	0.274809	0.725781	2247477802	1204187	0.000535795	376	1	375	0.00265957	7989	3	7986	0.000375516	8189	5	8184	0.000610575	0.022224	0.875003	0.051166	0.942225	0.75031	0.255817
wgEncodeSydhTfbsGm12878Srebp2IggrabPk.narrowPeak	2	narrowPeak	wgEncodeSydhTfbs	Srebp2	3095677412	1011542	0.000326759	376	1	0.901649	0.711264	0.290165	0.227338	0.771816	2247477802	619608	0.00027569	376	0	376	0	7989	1	7988	0.000125172	8189	2	8187	0.00024423	1	0.920001	1	0.940385	0.658915	0.313138
wgEncodeSydhTfbsGm12878Stat1StdPk.narrowPeak	2	narrowPeak	wgEncodeSydhTfbs	Stat1	3095677412	15021548	0.00485243	376	0.113777	0.885843	0.913499	0.087094	0.04609	0.953841	2247477802	9183235	0.00408602	376	4	372	0.0106383	7989	25	7964	0.0031293	8189	58	8131	0.00708267	0.363639	0.551726	0.146381	0.856986	0.981016	0.043468
wgEncodeSydhTfbsGm12878Stat3IggmusPk.narrowPeak	1	narrowPeak	wgEncodeSydhTfbs	Stat3	3095677412	9530841	0.00307876	376	0.296667	0.704126	0.969084	0.030887	0.632387	0.367689	2247477802	8503027	0.00378336	376	3	373	0.00797872	7989	21	7968	0.00262861	8189	23	8166	0.00280865	0.125006	0.843752	0.288941	0.739019	0.403628	0.579913
wgEncodeSydhTfbsGm12878Tblr1ab24550IggmusPk.narrowPeak	1	narrowPeak	wgEncodeSydhTfbs	Tblr1	3095677412	22102137	0.00713968	376	0.134395	0.865359	0.901531	0.097927	0.382337	0.617995	2247477802	15706168	0.00698835	376	5	371	0.0132979	7989	45	7944	0.00563275	8189	66	8123	0.00805959	0.116667	0.785713	0.180074	0.820928	0.701498	0.305175
wgEncodeSydhTfbsGm12878TbpIggmusPk.narrowPeak	1	narrowPeak	wgEncodeSydhTfbs	Tbp	3095677412	16801485	0.0054274	376	0.105658	0.894896	0.766214	0.233885	0.327879	0.672954	2247477802	12451234	0.00554009	376	4	372	0.0106383	7989	39	7950	0.00488171	8189	41	8148	0.00500672	0.181823	0.794118	0.145496	0.8598	0.660197	0.320609
wgEncodeSydhTfbsGm12878Tr4StdPk.narrowPeak	1	narrowPeak	wgEncodeSydhTfbs	Tr4	3095677412	1210452	0.000391014	376	1	0.861437	0.5634	0.436327	0.074702	0.925221	2247477802	896108	0.000398717	376	0	376	0	7989	3	7986	0.000375516	8189	7	8182	0.000854805	1	0.809089	1	0.918578	0.948098	0.080553
wgEncodeSydhTfbsGm12878Usf2IggmusPk.narrowPeak	1	narrowPeak	wgEncodeSydhTfbs	Usf2	3095677412	10117338	0.00326821	376	0.1405	0.859502	0.888738	0.11132	0.107426	0.892946	2247477802	6643866	0.00295614	376	2	374	0.00531915	7989	20	7969	0.00250344	8189	39	8150	0.00476249	0.223527	0.699999	0.198495	0.845649	0.904181	0.10376
wgEncodeSydhTfbsGm12878WhipIggmusPk.narrowPeak	1	narrowPeak	wgEncodeSydhTfbs	Whip	3095677412	28936915	0.00934752	376	0.128119	0.871603	0.426297	0.57331	0.135964	0.86335	2247477802	24182357	0.0107598	376	5	371	0.0132979	7989	78	7911	0.00976342	8189	147	8042	0.0179509	0.213482	0.935482	0.122319	0.877082	0.896718	0.085729
wgEncodeSydhTfbsGm12878Yy1StdPk.narrowPeak	1	narrowPeak	wgEncodeSydhTfbs	Yy1	3095677412	469693	0.000151725	376	1	0.935494	0.279734	0.720478	0.552591	0.447144	2247477802	402706	0.000179181	376	0	376	0	7989	3	7986	0.000375516	8189	1	8188	0.000122115	1	1	1	0.984685	0.513018	0.533111
wgEncodeSydhTfbsGm12878Znf143166181apStdPk.narrowPeak	1	narrowPeak	wgEncodeSydhTfbs	Znf1	3095677412	29215479	0.00943751	376	0.551999	0.447569	0.750653	0.248852	0.063673	0.936241	2247477802	19907030	0.0088575	376	3	373	0.00797872	7989	63	7926	0.00788584	8189	110	8079	0.0134327	0.50001	0.359999	0.453462	0.533277	0.973113	0.018708
wgEncodeSydhTfbsGm12878Znf274StdPk.narrowPeak	1	narrowPeak	wgEncodeSydhTfbs	Znf2	3095677412	1180411	0.000381309	376	1	0.883173	0.350715	0.649559	1	0.305441	2247477802	744668	0.000331335	376	0	376	0	7989	2	7987	0.000250344	8189	0	8189	0	1	1	1	0.933373	0.213561	1
wgEncodeSydhTfbsGm12878Znf384hpa004051IggmusPk.narrowPeak	1	narrowPeak	wgEncodeSydhTfbs	Znf3	3095677412	16155844	0.00521884	376	0.280979	0.718909	0.914491	0.085111	0.965967	0.034338	2247477802	12886029	0.00573355	376	3	373	0.00797872	7989	41	7948	0.00513206	8189	19	8170	0.00232019	0.302076	0.982759	0.254164	0.744955	0.042707	0.96126
wgEncodeSydhTfbsGm12878Zzz3StdPk.narrowPeak	1	narrowPeak	wgEncodeSydhTfbs	Zzz3	3095677412	373435	0.000120631	376	1	0.955442	1	0.379472	1	0.572363	2247477802	272652	0.000121315	376	0	376	0	7989	0	7989	0	8189	0	8189	0	1	1	1	0.968903	0.414167	1
wgEncodeUwDnaseGm12878HotspotsRep1.broadPeak|wgEncodeUwDnaseGm12878HotspotsRep2.broadPeak	2	broadPeak	wgEncodeUwDnase	DNAse-Hotspots	3095677412	128841478	0.0416198	376	0.287998	0.7117	0.724607	0.275323	0.020653	0.979264	2247477802	106809439	0.0475241	376	23	353	0.0611702	7989	329	7660	0.0411816	8189	707	7482	0.0863353	0.741935	0.365854	0.277786	0.709044	1	1e-06
wgEncodeUwDnaseGm12878PkRep1.narrowPeak|wgEncodeUwDnaseGm12878PkRep2.narrowPeak	2	narrowPeak	wgEncodeUwDnase	DNAse	3095677412	27509540	0.00888644	376	0.171698	0.829271	0.911395	0.089063	0.355416	0.645426	2247477802	21735503	0.00967106	376	4	372	0.0106383	7989	69	7920	0.00863688	8189	96	8093	0.011723	0.207919	0.765955	0.179556	0.837304	0.628682	0.363266
wgEncodeUwHistoneGm12878H3k27me3StdHotspotsRep1.broadPeak|wgEncodeUwHistoneGm12878H3k27me3StdHotspotsRep2.broadPeak	2	broadPeak	wgEncodeUwHistone	H3k27me3_Hotspots	3095677412	117471564	0.037947	376	0.694541	0.304755	0.382306	0.616975	0.006475	0.99327	2247477802	103722259	0.0461505	376	10	366	0.0265957	7989	395	7594	0.049443	8189	791	7398	0.096593	0.90411	0.116888	0.647116	0.371134	1	1e-06
wgEncodeUwHistoneGm12878H3k27me3StdPkRep1.narrowPeak|wgEncodeUwHistoneGm12878H3k27me3StdPkRep2.narrowPeak	2	narrowPeak	wgEncodeUwHistone	H3k27me3	3095677412	6277470	0.00202782	376	1	0.960634	1	0.427461	1	0.535232	2247477802	5059788	0.00225132	376	0	376	0	7989	13	7976	0.00162724	8189	52	8137	0.00634998	1	1	1	0.980518	0.669813	1
wgEncodeUwHistoneGm12878H3k36me3StdHotspotsRep1.broadPeak|wgEncodeUwHistoneGm12878H3k36me3StdHotspotsRep2.broadPeak	2	broadPeak	wgEncodeUwHistone	H3k36me3_Hotspots	3095677412	142888417	0.0461574	376	0.233129	0.766951	0.739207	0.260163	1e-06	0.999998	2247477802	119628891	0.0532281	376	18	358	0.0478723	7989	391	7598	0.0489423	8189	2076	6113	0.253511	1	1e-06	0.250001	0.781212	1	1e-06
wgEncodeUwHistoneGm12878H3k36me3StdPkRep1.narrowPeak|wgEncodeUwHistoneGm12878H3k36me3StdPkRep2.narrowPeak	2	narrowPeak	wgEncodeUwHistone	H3k36me3	3095677412	18098890	0.0058465	376	0.078328	0.928207	0.839379	0.165409	0.000127	0.99988	2247477802	14747067	0.00656161	376	3	373	0.00797872	7989	45	7944	0.00563275	8189	526	7663	0.0642325	0.929294	0.25424	0.118626	0.888759	1	1e-06
wgEncodeUwHistoneGm12878H3k4me3StdHotspotsRep1.broadPeak|wgEncodeUwHistoneGm12878H3k4me3StdHotspotsRep2.broadPeak	2	broadPeak	wgEncodeUwHistone	H3k4me3_Hotspots	3095677412	80552093	0.0260208	376	0.437318	0.561675	0.93296	0.067335	0.001824	0.998275	2247477802	58817261	0.0261703	376	10	366	0.0265957	7989	190	7799	0.0237827	8189	475	7714	0.0580046	0.972969	0.046875	0.30361	0.663589	1	1e-06
wgEncodeUwHistoneGm12878H3k4me3StdPkRep1.narrowPeak|wgEncodeUwHistoneGm12878H3k4me3StdPkRep2.narrowPeak	2	narrowPeak	wgEncodeUwHistone	H3k4me3	3095677412	16770080	0.00541726	376	1	0.590598	0.801119	0.200041	0.004855	0.995264	2247477802	11501055	0.00511732	376	2	374	0.00531915	7989	35	7954	0.00438102	8189	102	8087	0.0124557	1	0.411764	1	0.777671	1	1e-06
wgEncodeUwTfbsGm12878CtcfStdHotspotsRep1.broadPeak|wgEncodeUwTfbsGm12878CtcfStdHotspotsRep2.broadPeak	2	broadPeak	wgEncodeUwTfbs	Ctcf_Hotspots	3095677412	50929524	0.0164518	376	0.402659	0.597237	0.712352	0.287458	0.002305	0.997584	2247477802	40589490	0.01806	376	7	369	0.018617	7989	144	7845	0.0180248	8189	333	7856	0.0406643	0.858821	0.347819	0.373171	0.593705	1	1e-06
wgEncodeUwTfbsGm12878CtcfStdPkRep1.narrowPeak|wgEncodeUwTfbsGm12878CtcfStdPkRep2.narrowPeak	2	narrowPeak	wgEncodeUwTfbs	Ctcf	3095677412	11437720	0.00369474	376	1	0.575783	0.848232	0.151462	0.172141	0.82889	2247477802	8472289	0.00376969	376	3	373	0.00797872	7989	29	7960	0.00362999	8189	67	8122	0.00818171	1	0.578948	1	0.74786	0.802343	0.205158
